# Supplementary material for: The Slugs of Britain and Ireland: Undetected and Undescribed Species Increase a Well-Studied, Economically Important Fauna by More Than 20%
Source: PLoS One. 2014 Apr 16;9(4):e91907. doi: 10.1371/journal.pone.0091907 (PMC3989179; doi:10.1371/journal.pone.0091907)
Supplement: Table S1 — Specimen data, haplotypes, and GenBank accession numbers. (XLS) [file pone.0091907.s004.xls]

## Sheet: Sheet1
(Original sort order)	Museum accession number	Specimen number	Haplotype number	Genbank accession numbers			Family	SSH	Morphological species	Country	Vice-county	Locality	Altitude (m)	Latitude	Longitude
				16S	COI	ITS-1
1	NMW.Z.2012.041.00014	12m2	Hap4	KF894107	-	KF894156	ARIONIDAE	1A	Arion (Arion) ater	UK: WALES	Breconshire (VC42)	Valley of Blaen Taf Fawr stream, route to Pen y Fan from A470, Brecon Beacons NP	550-600	51.8803	-3.4629
2	NMW.Z.2012.041.00020	12m4	-	-	-	KF894157	ARIONIDAE	1A	Arion (Arion) ater	UK: WALES	Breconshire (VC42)	Valley of Blaen Taf Fawr stream, route to Pen y Fan from A470, Brecon Beacons NP	550-600	51.8803	-3.4629
3	NMW.Z.2012.041.00051	DC8	Hap2	KF894096	-	KF894167	ARIONIDAE	1A	Arion (Arion) ater	UK: ENGLAND	East Cornwall (VC2)	off A30 at Minzies Downs, Bolventor, Bodmin Moor, NE of Bodmin	300	50.5562	-4.57215
4	NMW.Z.2012.041.00064	DF6	Hap5	KF894114	-	KF894169	ARIONIDAE	1A	Arion (Arion) ater	UK: ENGLAND	Nottinghamshire (VC56)	Dyscarr Wood NR (Notts. WT) & Langold Country Park, Langold, N of Worksop	40	53.3749	-1.12966
5	NMW.Z.2011.038.00012	EA2	Hap3	KF894102	-	KF894172	ARIONIDAE	1A	Arion (Arion) ater	UK: ENGLAND	East Norfolk (VC27)	Wheatfen Broad/Ted Ellis Trust NR, Norfolk & Suffolk Broads NP, Surlingham, SE of Norwich	<10	52.5974	1.43456
6	NMW.Z.2011.038.00013	EA3	Hap1	KF894088	-	KF894173	ARIONIDAE	1A	Arion (Arion) ater	UK: ENGLAND	East Norfolk (VC27)	Wheatfen Broad/Ted Ellis Trust NR, Norfolk & Suffolk Broads NP, Surlingham, SE of Norwich	<10	52.5974	1.43456
7	NMW.Z.2011.037.00006	I13	Hap1	KF894088	-	KF894176	ARIONIDAE	1A	Arion (Arion) ater	REP. IRELAND	North Kerry (H2)	Muckross Peninsula, W of Cloghereen, Killarney NP	30	52.0212	-9.50865
8	NMW.Z.2011.037.00014	I32	Hap4	KF894107	-	KF894178	ARIONIDAE	1A	Arion (Arion) ater	REP. IRELAND	North Kerry (H2)	Mangerton Mountain, above Gortagullane, Killarney NP	150-680	51.9792	-9.48977
9	NMW.Z.2011.037.00029	I53	Hap1	KF894088	-	KF894180	ARIONIDAE	1A	Arion (Arion) ater	REP. IRELAND	West Galway (H16)	E end of Rusheen Bay, Knocknacarra, E of Salthill, Galway city	<10	53.2587	-9.10972
10	NMW.Z.2011.037.00033	I6	-	KF894124	-	KF894182	ARIONIDAE	1A	Arion (Arion) ater	REP. IRELAND	East Cork (H5)	Near Rostellan, E coast of Cork Harbour	35	51.8536	-8.1836
11	NMW.Z.2011.037.00038	I66	-	KF894123	-	KF894181	ARIONIDAE	1A	Arion (Arion) ater	REP. IRELAND	West Galway (H16)	around Lettercraffoe Lough, SW of Oughterard, W of Lough Corrib	220	53.3807	-9.38944
12	NMW.Z.2011.037.00044	I76	-	KF894125	-	-	ARIONIDAE	1A	Arion (Arion) ater	REP. IRELAND	Roscommon (H25)	St. John's Wood, W shore of Loch Ree near Lecarrow, N of Athlone	45	53.5568	-8.00527
13	NMW.Z.2011.037.00052	I90	Hap1	KF894088	-	KF894184	ARIONIDAE	1A	Arion (Arion) ater	UK: NORTHERN IRELAND	Fermanagh (H33)	Florence Court Demesne, near Gortnacally, SW of Enniskillen	90	54.2592	-7.73065
14	NMW.Z.2011.038.00029	K3	-	KF894127	-	KF894189	ARIONIDAE	1A	Arion (Arion) ater	UK: ENGLAND	East Kent (VC15)	Homestall Wood, Blean Woods NNR, E of Rough Common, W of Canterbury	75	51.2942	1.04079
15	NMW.Z.2012.041.00069	L1	Hap3	KF894102	-	KF894191	ARIONIDAE	1A	Arion (Arion) ater	UK: ENGLAND	Westmorland (VC69)	Lane to Low Hall Garth, Moss Rigg Wood, W of Ambleside, Lake District NP	150	54.4169	-3.0617
16	NMW.Z.2012.041.00100	M7	-	KF894135	-	KF894198	ARIONIDAE	1A	Arion (Arion) ater	UK: ENGLAND	Cambridgeshire (VC29)	Wicken, SE of Soham, S of Ely	5	52.3074	0.302886
17	NMW.Z.2012.041.00106	NF13	-	KF894137	-	-	ARIONIDAE	1A	Arion (Arion) ater	UK: ENGLAND	South Wiltshire (VC8)	Rufus Stone area, Upper Canterton, NE of Minstead, New Forest NP	85	50.9095	-1.61592
18	NMW.Z.2011.002.00005	S2	Hap1	KF894088	-	KF894206	ARIONIDAE	1A	Arion (Arion) ater	UK: SCOTLAND	West Ross & Cromarty (VC105)	Meall Fearna, Beinn Eighe NNR, near Kinlochewe	200	57.5942	-5.32975
19	NMW.Z.2011.002.00010	S29	Hap5	KF894114	-	KF894205	ARIONIDAE	1A	Arion (Arion) ater	UK: SCOTLAND	West Ross & Cromarty (VC105)	Rassall Ashwood NNR, near Kishorn River, NE of Lochcarron	70	57.427	-5.59118
20	NMW.Z.2011.002.00015	S39	Hap1	KF894088	-	KF894207	ARIONIDAE	1A	Arion (Arion) ater	UK: SCOTLAND	Moray (VC95)	Craigellachie NNR, near Aviemore, Cairngorms NP	210	57.1898	-3.83995
21	NMW.Z.2011.002.00032	S8	-	KF894146	-	KF894209	ARIONIDAE	1A	Arion (Arion) ater	UK: SCOTLAND	West Ross & Cromarty (VC105)	Meall Fearna, Beinn Eighe NNR, near Kinlochewe	200	57.5942	-5.32975
22	NMW.Z.2011.038.00048	SK9	Hap1	KF894088	-	KF894210	ARIONIDAE	1A	Arion (Arion) ater	UK: WALES	Pembrokeshire (VC45)	Skomer Island NNR, Pembrokeshire Coast NP	50	51.7406	-5.2966
23	NMW.Z.2012.041.00133	SN1	Hap1	KF894088	-	KF894212	ARIONIDAE	1A	Arion (Arion) ater	UK: WALES	Caernarvonshire (VC49)	near Pencraig, NE of Betws-y-Coed, Snowdonia NP	200	53.1068	-3.83584
24	NMW.Z.2012.041.00136	SN13	-	KF894147	-	KF894211	ARIONIDAE	1A	Arion (Arion) ater	UK: WALES	Merionethshire (VC48)	Cwm Cau, Cadair Idris NNR, S of Dolgellau, Snowdonia NP	505	52.6923	-3.8983
25	NMW.Z.2011.038.00055	WF12	-	KF894149	-	KF894214	ARIONIDAE	1A	Arion (Arion) ater	UK: ENGLAND	Worcestershire (VC37)	New Parks Wood, Wyre Forest NNR, near Callow Hill, W of Kidderminster	100	52.3787	-2.38338
26	NMW.Z.2011.038.00061	WW1	Hap1	KF894088	-	-	ARIONIDAE	1A	Arion (Arion) ater	UK: ENGLAND	South Devon (VC3)	Wistman’s Wood NNR, N of Two Bridges, Dartmoor NP, E of Tavistock	410	50.5771	-3.96167
27	NMW.Z.2012.041.00154	Y1	-	KF894152	-	-	ARIONIDAE	1A	Arion (Arion) ater	UK: ENGLAND	Derbyshire (VC57)	between Castleton and Cave Dale, NE of Buxton, Peak District NP	250	53.3401	-1.77618
28	NMW.Z.2012.041.00173	Y37	Hap1	KF894088	-	KF894217	ARIONIDAE	1A	Arion (Arion) ater	UK: ENGLAND	North-east Yorkshire (VC62)	Baxton's Wood, N of Carlton, Helmsley, North Yorks Moors NP	220	54.2903	-1.06132
29	NMW.Z.2014.001.00001	AV1	-	KF894080	-	-	ARIONIDAE	1B + 1C	Arion (Arion) cf. vulgaris	UK: ENGLAND	Surrey (VC17)	Beechwood Road, Sanderstead/South Croydon.	100	51.35	-0.09
30	NMW.Z.2012.041.00061	DF23	Hap16	KF894092	-	KF894168	ARIONIDAE	1B + 1C	Arion (Arion) cf. vulgaris	UK: ENGLAND	Cambridgeshire (VC29)	Wicken, SE of Soham, S of Ely	5	52.3146	0.303259
31	NMW.Z.2011.038.00022	K14	Hap16	KF894092	-	KF894188	ARIONIDAE	1B + 1C	Arion (Arion) cf. vulgaris	UK: ENGLAND	East Kent (VC15)	Grimshill Wood, Blean Woods NNR, E of Blean, NW of Canterbury	85	51.3062	1.0301
32	NMW.Z.2012.041.00074	M11	Hap16	KF894092	-	KF894194	ARIONIDAE	1B + 1C	Arion (Arion) cf. vulgaris	UK: ENGLAND	Cambridgeshire (VC29)	Wicken, SE of Soham, S of Ely	5	52.312	0.301654
33	NMW.Z.2012.041.00088	M3	Hap16	KF894092	-	KF894195	ARIONIDAE	1B + 1C	Arion (Arion) cf. vulgaris	UK: ENGLAND	Cambridgeshire (VC29)	Wicken, SE of Soham, S of Ely	5	52.3146	0.303259
34	NMW.Z.2012.041.00097	M4	Hap16	KF894092	-	KF894196	ARIONIDAE	1B + 1C	Arion (Arion) cf. vulgaris	UK: ENGLAND	Cambridgeshire (VC29)	Wicken, SE of Soham, S of Ely	5	52.3146	0.303259
35	NMW.Z.2011.038.00038	NL5	Hap16	KF894092	-	KF894200	ARIONIDAE	1B + 1C	Arion (Arion) cf. vulgaris	UK: ENGLAND	East Kent (VC15)	Sandling Wood, near Maidstone	20	51.293	0.525725
36	NMW.Z.2012.041.00162	Y2	Hap16	KF894092	-	KF894215	ARIONIDAE	1B + 1C	Arion (Arion) cf. vulgaris	UK: ENGLAND	North-east Yorkshire (VC62)	Buttercrambe Moor Woods, N of Stamford Bridge, E of York	15	54.0015	-0.918314
37	NMW.Z.2011.038.00001	AB1	Hap8	KF894119	-	KF894159	ARIONIDAE	2	Arion (Arion) rufus	UK: WALES	Monmouthshire (VC35)	Aberbargoed, Rhymney Valley, Caerphilly County Borough	260	51.6987	-3.22117
38	NMW.Z.2014.001.00002	AV4	Hap14	KF894091	-	-	ARIONIDAE	2	Arion (Arion) rufus	UK: ENGLAND	Surrey (VC17)	Beechwood Road, Sanderstead/South Croydon.	100	51.35	-0.09
39	NMW.Z.2011.038.00005	BB1	Hap12	KF894089	-	KF894161	ARIONIDAE	2	Arion (Arion) rufus	UK: WALES	Breconshire (VC42)	Base of Craig y Fro, W of Storey Arms, Brecon Beacons NP	400	51.8771	-3.49621
40	NMW.Z.2012.041.00042	DC20	Hap8	KF894119	-	KF894164	ARIONIDAE	2	Arion (Arion) rufus	UK: ENGLAND	East Cornwall (VC2)	North Hill Wood, Luxulyan Valley, SE of Luxulyan, NE of St. Austell	80	50.379	-4.72994
41	NMW.Z.2012.041.00050	DC7	Hap14	KF894091	-	KF894166	ARIONIDAE	2	Arion (Arion) rufus	UK: ENGLAND	West Cornwall (VC1)	Black Cliff, The Towans, N of Hayle	15	50.1986	-5.42736
42	NMW.Z.2012.041.00065	DF7	Hap8	KF894119	-	KF894170	ARIONIDAE	2	Arion (Arion) rufus	UK: ENGLAND	Nottinghamshire (VC56)	Dyscarr Wood NR (Notts. WT) & Langold Country Park, Langold, N of Worksop	40	53.3749	-1.12966
43	NMW.Z.2012.043.00001	EMP	Hap14	KF894091	-	-	ARIONIDAE	2	Arion (Arion) rufus	UK: JERSEY	Channel Islands (VC113)	Groznez, St. Ouen, Jersey	20	49.25	-2.24
44	NMW.Z.2012.041.00068	EN1	Hap13	KF894090	-	KF894174	ARIONIDAE	2	Arion (Arion) rufus	UK: ENGLAND	Middlesex (VC21)	Enfield, N London	50	51.6471	-0.0791032
45	NMW.Z.2012.043.00002	HEB	-	KF894120	-	KF894175	ARIONIDAE	2	Arion (Arion) rufus	UK: SCOTLAND	Outer Hebrides (VC110)	Col, Isle of Lewis	10	58.27	-6.31
46	NMW.Z.2012.041.00070	L2	Hap12	KF894089	-	KF894192	ARIONIDAE	2	Arion (Arion) rufus	UK: ENGLAND	Westmorland (VC69)	Baysbrown Farm Woods, Elterwater, W of Ambleside, Lake District NP	200-300	54.4331	-3.05442
47	NMW.Z.2012.041.00077	M16	-	KF894128	-	-	ARIONIDAE	2	Arion (Arion) rufus	UK: ENGLAND	Nottinghamshire (VC56)	Burton Joyce, E of Nottingham	50	52.9922	-1.04203
48	NMW.Z.2012.041.00099	M5	-	KF894133	-	KF894197	ARIONIDAE	2	Arion (Arion) rufus	UK: ENGLAND	Nottinghamshire (VC56)	Burton Joyce, E of Nottingham	50	52.9922	-1.04203
49	NMW.Z.2013.072.00018	M59	Hap8	KF894119	-	-	ARIONIDAE	2	Arion (Arion) rufus	UK: ENGLAND	Surrey (VC17)	Lambeth, C London	15	51.49	-0.11
50	NMW.Z.2012.041.00116	PGO3	Hap8	KF894119	-	KF894201	ARIONIDAE	2	Arion (Arion) rufus	UK: ENGLAND	West Sussex (VC13)	Findon Valley, N suburbs of Worthing	50	50.8488	-0.394781
51	NMW.Z.2011.038.00041	PYC1	-	KF894139	-	KF894202	ARIONIDAE	2	Arion (Arion) rufus	UK: WALES	Glamorganshire (VC41)	Pontyclun, Rhondda Cynon Taf, W of Cardiff	55	51.5251	-3.38806
52	NMW.Z.2012.041.00121	PYC6	Hap13	KF894090	-	-	ARIONIDAE	2	Arion (Arion) rufus	UK: WALES	Glamorganshire (VC41)	Pontyclun, Rhondda Cynon Taf, W of Cardiff	55	51.5251	-3.38806
53	NMW.Z.2011.038.00042	ROY1	Hap12	KF894089	-	KF894203	ARIONIDAE	2	Arion (Arion) rufus	UK: NORTHERN IRELAND	Co. Down (H38)	Aughnadarragh Loch, E of Saintfield	c25	54.4618	-5.77515
54	NMW.Z.2011.038.00043	ROY2	Hap12	KF894089	-	KF894204	ARIONIDAE	2	Arion (Arion) rufus	UK: NORTHERN IRELAND	Co. Londonderry (H40)	Downhill Forest, Downhill, W of Portstewart	c130	55.1539	-6.81002
55	NMW.Z.2012.041.00142	SN2	Hap8	KF894119	-	KF894213	ARIONIDAE	2	Arion (Arion) rufus	UK: WALES	Merionethshire (VC48)	Grounds of Plas Tan-y-Bwlch, N of Maentwrog, Vale of Ffestiniog, Snowdonia NP	60	52.9468	-4.00171
56	NMW.Z.2012.041.00171	Y34	-	KF894154	-	KF894216	ARIONIDAE	2	Arion (Arion) rufus	UK: ENGLAND	Mid-west Yorkshire (VC64)	Grass Wood NR (WT), Grassington, Wharfedale, Yorkshire Dales NP	250	54.0872	-2.02442
57	NMW.Z.2012.041.00181	ZOO1	Hap13	KF894090	-	KF894218	ARIONIDAE	2	Arion (Arion) rufus	UK: ENGLAND	West Gloucestershire (VC34)	Bristol Zoo, Clifton, Bristol	100	51.4633	-2.62324
58	NMW.Z.2013.072.00017	M58	-	KF894132	-	-	ARIONIDAE	3	Arion (Arion) cf. empiricorum	UK: ENGLAND	Middlesex (VC21)	Kensal Green Cemetery, Kensal Green, WC London	50	51.53	-0.23
59	NMW.Z.2012.041.00024	12m9	Hap17	KF894093	-	KF894158	ARIONIDAE	4	Arion (Arion) vulgaris	UK: NORTHERN IRELAND	Antrim (H39)	Belvoir Park Forest, Lagan Valley Regional Park, S suburbs of Belfast	35	54.5571	-5.92922
60	NMW.Z.2014.001.00003	AV8	-	KF894081	-	-	ARIONIDAE	4	Arion (Arion) vulgaris	UK: SCOTLAND	Midlothian (VC83)	Melville Castle, Lasswade, SE of Edinburgh	100	55.89	-3.11
61	NMW.Z.2012.041.00031	DC1	Hap17	KF894093	-	KF894163	ARIONIDAE	4	Arion (Arion) vulgaris	UK: ENGLAND	South Devon (VC3)	Exhibition Road, East Town, Crediton	45	50.7934	-3.64436
62	NMW.Z.2012.041.00037	DC15	Hap17	KF894093	-	KF894162	ARIONIDAE	4	Arion (Arion) vulgaris	UK: ENGLAND	South Devon (VC3)	Brunel Woods, near Daccombe, N part of Torquay	130	50.4918	-3.95109
63	NMW.Z.2011.037.00007	I14	-	KF894121	-	KF894177	ARIONIDAE	4	Arion (Arion) vulgaris	REP. IRELAND	Mid Cork (H4)	Central Cork city	<10	51.8959	-8.49177
64	NMW.Z.2011.037.00054	I93	Hap17	KF894093	-	KF894185	ARIONIDAE	4	Arion (Arion) vulgaris	UK: NORTHERN IRELAND	Antrim (H39)	Belvoir Park Forest, Lagan Valley Regional Park, S suburbs of Belfast	35	54.5571	-5.92922
65	NMW.Z.2011.037.00055	I94	Hap17	KF894093	-	KF894186	ARIONIDAE	4	Arion (Arion) vulgaris	UK: NORTHERN IRELAND	Antrim (H39)	Belvoir Park Forest, Lagan Valley Regional Park, S suburbs of Belfast	35	54.5571	-5.92922
66	NMW.Z.2012.041.00082	M20	Hap17	KF894093	-	-	ARIONIDAE	4	Arion (Arion) vulgaris	UK: ENGLAND	South Devon (VC3)	Heywood Drive allotments, Starcross, S of Exeter	10	50.63	-3.45
67	NMW.Z.2014.001.00007	M41	-	KF894131	-	-	ARIONIDAE	4	Arion (Arion) vulgaris	AUSTRIA	-	Near Linz	280	48.3	14.28
68	NMW.Z.2013.072.00013	M54	Hap17	KF894093	-	-	ARIONIDAE	4	Arion (Arion) vulgaris	UK: ENGLAND	Surrey (VC17)	Old Fox Farm footpath, Sanderstead/South Croydon	100	51.35	-0.09
69	NMW.Z.2013.072.00014	M55	Hap18	KF894094	-	-	ARIONIDAE	4	Arion (Arion) vulgaris	UK: ENGLAND	Surrey (VC17)	Allotments between railway lines, South Croydon	80	51.35	-0.09
70	NMW.Z.2013.072.00015	M56	Hap18	KF894094	-	-	ARIONIDAE	4	Arion (Arion) vulgaris	UK: ENGLAND	Surrey (VC17)	Allotments between railway lines, South Croydon	80	51.35	-0.09
71	NMW.Z.2013.072.00016	M57	Hap18	KF894094	-	-	ARIONIDAE	4	Arion (Arion) vulgaris	UK: ENGLAND	Surrey (VC17)	Allotments between railway lines, South Croydon	80	51.35	-0.09
72	NMW.Z.2013.072.00021	M62	Hap18	KF894094	-	-	ARIONIDAE	4	Arion (Arion) vulgaris	UK: ENGLAND	Surrey (VC17)	Allotments between railway lines, South Croydon	80	51.35	-0.09
73	NMW.Z.2013.072.00023	M66	Hap17	KF894093	-	-	ARIONIDAE	4	Arion (Arion) vulgaris	UK: ENGLAND	Surrey (VC17)	Old Fox Farm footpath, Sanderstead/South Croydon	100	51.35	-0.09
74	NMW.Z.2012.041.00101	M8	-	KF894136	-	-	ARIONIDAE	4	Arion (Arion) vulgaris	UK: ENGLAND	Cambridgeshire (VC29)	Wicken, SE of Soham, S of Ely	5	52.3074	0.302886
75	NMW.Z.2012.041.00113	NF6	Hap17	KF894093	-	KF894199	ARIONIDAE	4	Arion (Arion) vulgaris	UK: ENGLAND	South Wiltshire (VC8)	Cycle path near allotments, E of River Avon, Salisbury	50	51.08	-1.80295
76	NMW.Z.2012.041.00115	PGO2	-	KF894138	-	-	ARIONIDAE	4	Arion (Arion) vulgaris	UK: ENGLAND	West Sussex (VC13)	Findon Valley, N suburbs of Worthing	50	50.8488	-0.394781
77	NMW.Z.2012.041.00155	Y11	-	KF894150	-	-	ARIONIDAE	4	Arion (Arion) vulgaris	UK: ENGLAND	North-east Yorkshire (VC62)	behind The Spa complex, South Bay, Scarborough	10	54.2761	-0.398166
78	NMW.Z.2011.038.00004	AB5	Hap6	KF894118	-	KF894160	ARIONIDAE	5	Arion (Arion) flagellus	UK: WALES	Monmouthshire (VC35)	Aberbargoed Grasslands SAC (CCW), Aberbargoed, Rhymney Valley, Caerphilly County Borough	240	51.6853	-3.21358
79	NMW.Z.2012.041.00049	DC6	Hap6	KF894118	-	KF894165	ARIONIDAE	5	Arion (Arion) flagellus	UK: ENGLAND	West Cornwall (VC1)	Black Cliff, The Towans, N of Hayle	15	50.1986	-5.42736
80	NMW.Z.2011.038.00006	DN1	Hap6	KF894118	-	KF894171	ARIONIDAE	5	Arion (Arion) flagellus	UK: WALES	Denbighshire (VC50)	Glyn Ceiriog, Ceiriog Valley, SE of Llangollen	230	52.9054	-3.2028
81	NMW.Z.2011.037.00022	I44	Hap6	KF894118	-	KF894179	ARIONIDAE	5	Arion (Arion) flagellus	REP. IRELAND	North Kerry (H2)	Torc Waterfalls, Killarney NP	65	52.0047	-9.52994
82	NMW.Z.2011.037.00049	I85	Hap6	KF894118	-	KF894183	ARIONIDAE	5	Arion (Arion) flagellus	UK: NORTHERN IRELAND	Antrim (H39)	Belvoir Park Forest, Lagan Valley Regional Park, S suburbs of Belfast	35	54.5571	-5.92922
83	NMW.Z.2011.037.00051	I9	Hap6	KF894118	-	KF894187	ARIONIDAE	5	Arion (Arion) flagellus	REP. IRELAND	West Cork (H3)	Schull and environs, near Ballydehob	c10	51.5263	-9.54555
84	NMW.Z.2011.038.00020	K11	Hap6	KF894118	-	-	ARIONIDAE	5	Arion (Arion) flagellus	UK: ENGLAND	West Kent (VC16)	One Tree Hill (National Trust), N of Underriver, E of Sevenoaks	165	51.2575	0.234257
85	NMW.Z.2011.038.00031	K5	Hap6	KF894118	-	KF894190	ARIONIDAE	5	Arion (Arion) flagellus	UK: ENGLAND	East Sussex (VC14)	Powdermill Reservoir, Brede High Woods (WT), near Cripp's Corner, High Weald AONB, N of Hastings	25	50.9505	0.558367
86	NMW.Z.2012.041.00072	L5	Hap6	KF894118	-	KF894193	ARIONIDAE	5	Arion (Arion) flagellus	UK: ENGLAND	Westmorland (VC69)	Baysbrown Farm Woods, Elterwater, W of Ambleside, Lake District NP	200-300	54.4331	-3.05442
87	NMW.Z.2011.038.00035	NL1	Hap6	KF894118	-	-	ARIONIDAE	5	Arion (Arion) flagellus	UK: ENGLAND	North Lincolnshire (VC54)	Walesby, NE of Market Rasen, NE of Lincoln	75	53.4127	-0.301395
88	NMW.Z.2011.038.00037	NL3	Hap6	KF894118	-	-	ARIONIDAE	5	Arion (Arion) flagellus	UK: ENGLAND	North Lincolnshire (VC54)	Walesby, NE of Market Rasen, NE of Lincoln	75	53.4127	-0.301395
89	NMW.Z.2012.041.00118	PYC2	Hap6	KF894118	-	-	ARIONIDAE	5	Arion (Arion) flagellus	UK: WALES	Glamorganshire (VC41)	Pontyclun, Rhondda Cynon Taf, W of Cardiff	55	51.5251	-3.38806
90	NMW.Z.2012.041.00119	PYC3	Hap6	KF894118	-	-	ARIONIDAE	5	Arion (Arion) flagellus	UK: WALES	Glamorganshire (VC41)	Pontyclun, Rhondda Cynon Taf, W of Cardiff	55	51.5251	-3.38806
91	NMW.Z.2012.041.00120	PYC4	Hap6	KF894118	-	-	ARIONIDAE	5	Arion (Arion) flagellus	UK: WALES	Glamorganshire (VC41)	Pontyclun, Rhondda Cynon Taf, W of Cardiff	55	51.5251	-3.38806
92	NMW.Z.2011.002.00006	S24	Hap6	KF894118	-	-	ARIONIDAE	5	Arion (Arion) flagellus	UK: SCOTLAND	West Ross & Cromarty (VC105)	Rassall Ashwood NNR, near Kishorn River, NE of Lochcarron	70	57.427	-5.59118
93	NMW.Z.2011.002.00007	S25	Hap6	KF894118	-	-	ARIONIDAE	5	Arion (Arion) flagellus	UK: SCOTLAND	West Ross & Cromarty (VC105)	Rassall Ashwood NNR, near Kishorn River, NE of Lochcarron	70	57.427	-5.59118
94	NMW.Z.2011.002.00030	S68	-	KF894145	-	-	ARIONIDAE	5	Arion (Arion) flagellus	UK: SCOTLAND	Dumfriesshire (VC72)	A75 road between Annan & Gretna	20	54.9925	-3.20502
95	NMW.Z.2011.002.00031	S7	Hap6	KF894118	-	KF894208	ARIONIDAE	5	Arion (Arion) flagellus	UK: SCOTLAND	West Ross & Cromarty (VC105)	Meall Fearna, Beinn Eighe NNR, near Kinlochewe	200	57.5942	-5.32975
96	NMW.Z.2012.041.00148	SN8	Hap6	KF894118	-	-	ARIONIDAE	5	Arion (Arion) flagellus	UK: WALES	Caernarvonshire (VC49)	near Pencraig, NE of Betws-y-Coed, Snowdonia NP	200	53.1068	-3.83584
97	NMW.Z.2012.041.00174	Y38	Hap6	KF894118	-	-	ARIONIDAE	5	Arion (Arion) flagellus	UK: ENGLAND	North-east Yorkshire (VC62)	Forge Valley Woods NNR, East Ayton, E of Scarborough	50	54.2574	-0.481791
98	NMW.Z.2012.041.00067	DF9	Hap19	KF894095	-	-	ARIONIDAE	6	Arion (Mesarion) fuscus	UK: ENGLAND	Nottinghamshire (VC56)	Ash Tree Hill Wood, Clumber Park Country Park (NT), Sherwood Forest area, S of Worksop	90	53.2709	-1.0523
99	NMW.Z.2011.002.00024	S52	Hap19	KF894095	-	-	ARIONIDAE	6	Arion (Mesarion) fuscus	UK: SCOTLAND	Moray (VC95)	near Roches Moutonèes picnic area, Dulnain Bridge, Cairngorms NP	210	57.3047	-3.65645
100	NMW.Z.2012.041.00023	12m8	Hap24	KF894098	-	-	ARIONIDAE	7	Arion (Mesarion) subfuscus	UK: WALES	Glamorganshire (VC41)	Pontyclun, Rhondda Cynon Taf, W of Cardiff	55	51.5251	-3.38806
101	NMW.Z.2012.041.00033	DC11	Hap25	KF894099	-	-	ARIONIDAE	7	Arion (Mesarion) subfuscus	UK: ENGLAND	East Cornwall (VC2)	North Hill Wood, Luxulyan Valley, SE of Luxulyan, NE of St. Austell	80	50.379	-4.72994
102	NMW.Z.2011.038.00010	DN8	Hap23	KF894097	-	-	ARIONIDAE	7	Arion (Mesarion) subfuscus	UK: WALES	Denbighshire (VC50)	Glyn Ceiriog, Ceiriog Valley, SE of Llangollen	230	52.9054	-3.2028
103	NMW.Z.2011.037.00026	I49	Hap23	KF894097	-	-	ARIONIDAE	7	Arion (Mesarion) subfuscus	REP. IRELAND	South-east Galway (H15)	Coole Lough, near Gort, E edge of the Burren area	150	53.092	-8.84119
104	NMW.Z.2011.038.00030	K4	Hap24	KF894098	-	-	ARIONIDAE	7	Arion (Mesarion) subfuscus	UK: ENGLAND	East Kent (VC15)	Folkestone Warren Country Park, E edge of Folkestone	50	51.0947	1.20337
105	NMW.Z.2012.041.00081	M2	-	KF894130	-	-	ARIONIDAE	7	Arion (Mesarion) subfuscus	UK: WALES	Glamorganshire (VC41)	Nant y Gwyddon (FC), NW of Llwynypia, N of Tonypandy, Rhondda Fawr	200	51.6401	-3.46527
106	NMW.Z.2012.041.00084	M22	Hap25	KF894099	-	-	ARIONIDAE	7	Arion (Mesarion) subfuscus	UK: WALES	Pembrokeshire (VC45)	Ty Canol NNR, Pentre Ifan, W of Eglwyswrw, Mynydd Preseli	110	52.0013	-4.77951
107	NMW.Z.2014.001.00005	M38	Hap26	KF894100	-	-	ARIONIDAE	7	Arion (Mesarion) subfuscus	UK: NORTHERN IRELAND	Co. Antrim (H39)	Duncrue St., north Belfast	5	54.62	-5.91
108	NMW.Z.2014.001.00006	M39	Hap25	KF894099	-	-	ARIONIDAE	7	Arion (Mesarion) subfuscus	UK: NORTHERN IRELAND	Co. Antrim (H39)	Duncrue St., north Belfast	5	54.62	-5.91
109	NMW.Z.2013.072.00011	M52	Hap24	KF894098	-	-	ARIONIDAE	7	Arion (Mesarion) subfuscus	UK: NORTHERN IRELAND	Co. Antrim (H39)	Shaw's Bridge, south Belfast	10	54.55	-5.94
110	NMW.Z.2013.072.00022	M65	-	KF894134	-	-	ARIONIDAE	7	Arion (Mesarion) subfuscus	UK: ENGLAND	Middlesex (VC21)	Kensal Green Cemetery, Kensal Green, WC London	50	51.53	-0.23
111	NMW.Z.2012.041.00103	MRW2	Hap24	KF894098	-	-	ARIONIDAE	7	Arion (Mesarion) subfuscus	UK: SCOTLAND	Outer Hebrides (VC110)	Asgeirnis, South Uist	10	57.19	-7.4
112	NMW.Z.2012.041.00109	NF2	Hap25	KF894099	-	-	ARIONIDAE	7	Arion (Mesarion) subfuscus	UK: ENGLAND	South Wiltshire (VC8)	Layby off A338, S of Burbage, S of Marlborough	180	51.3386	-1.67408
113	NMW.Z.2012.041.00110	NF3	Hap26	KF894100	-	-	ARIONIDAE	7	Arion (Mesarion) subfuscus	UK: ENGLAND	South Wiltshire (VC8)	Rufus Stone area, Upper Canterton, NE of Minstead, New Forest NP	85	50.9095	-1.61592
114	NMW.Z.2012.041.00126	REH2	Hap24	KF894098	-	-	ARIONIDAE	7	Arion (Mesarion) subfuscus	UK: ENGLAND	Worcestershire (VC37)	Abberley Hill, Abberley, Great Witley, SW of Kidderminster	275	52.3015	-2.36364
115	NMW.Z.2009.030.00002	Ret3	-	KF894141	-	-	ARIONIDAE	7	Arion (Mesarion) subfuscus	UK: ENGLAND	South Hampshire (VC11)	Crab Wood, W of Winchester	140	51.0632	-1.37777
116	NMW.Z.2011.002.00025	S55	-	KF894144	-	-	ARIONIDAE	7	Arion (Mesarion) subfuscus	UK: SCOTLAND	Mid Perthshire (VC88)	hill above Easter Moncreiffe, N of Bridge of Earn, S of Perth	50	56.3601	-3.37893
117	NMW.Z.2011.038.00053	WF10	Hap25	KF894099	-	-	ARIONIDAE	7	Arion (Mesarion) subfuscus	UK: ENGLAND	Worcestershire (VC37)	New Parks Wood, Wyre Forest NNR, near Callow Hill, W of Kidderminster	100	52.3787	-2.38338
118	NMW.Z.2012.041.00163	Y20	Hap25	KF894099	-	-	ARIONIDAE	7	Arion (Mesarion) subfuscus	UK: ENGLAND	South-east Yorkshire (VC61)	Braisthwaite Bridge, Howsham Woods, N of Stamford Bridge, E of York	20	54.0524	-0.891022
119	NMW.Z.2012.041.00169	Y30	-	KF894153	-	-	ARIONIDAE	7	Arion (Mesarion) subfuscus	UK: ENGLAND	North-east Yorkshire (VC62)	Sutton Bank, Hambleton Hills, W of Thirsk North Yorks Moors NP	280	54.2383	-1.2098
120	NMW.Z.2012.041.00178	Y5	-	KF894155	-	-	ARIONIDAE	7	Arion (Mesarion) subfuscus	UK: ENGLAND	Mid-west Yorkshire (VC64)	Grass Wood NR (WT), Grassington, Wharfedale, Yorkshire Dales NP	250	54.0872	-2.02442
121	NMW.Z.2012.041.00019	12m3	-	KF894078	-	-	ARIONIDAE	8	Arion (Mesarion) subfuscus	UK: WALES	Breconshire (VC42)	Valley of Blaen Taf Fawr stream, route to Pen y Fan from A470, Brecon Beacons NP	550-600	51.8803	-3.4629
122	NMW.Z.2011.037.00018	I40	-	KF894122	-	-	ARIONIDAE	8	Arion (Mesarion) subfuscus	REP. IRELAND	North Kerry (H2)	Mangerton Mountain, above Gortagullane, Killarney NP	150-680	51.9792	-9.48977
123	NMW.Z.2011.037.00040	I7	-	KF894126	-	-	ARIONIDAE	8	Arion (Mesarion) subfuscus	REP. IRELAND	East Cork (H5)	Near Rostellan, E coast of Cork Harbour	35	51.8536	-8.1836
124	NMW.Z.2011.002.00013	S36	Hap27	KF894101	-	-	ARIONIDAE	8	Arion (Mesarion) subfuscus	UK: SCOTLAND	Moray (VC95)	Craigellachie NNR, near Aviemore, Cairngorms NP	210	57.1898	-3.83995
125	NMW.Z.2012.041.00134	SN11	Hap27	KF894101	-	-	ARIONIDAE	8	Arion (Mesarion) subfuscus	UK: WALES	Caernarvonshire (VC49)	Off B4407, near source of Afon Conwy, Migneint NNR, Snowdonia NP	420	52.9848	-3.81725
126	NMW.Z.2012.041.00137	SN15	-	KF894148	-	-	ARIONIDAE	8	Arion (Mesarion) subfuscus	UK: WALES	Merionethshire (VC48)	Cwm Cau, Cadair Idris NNR, S of Dolgellau, Snowdonia NP	505	52.6923	-3.8983
127	NMW.Z.2012.041.00001	12BB1	-	KF894075	-	-	ARIONIDAE	9 + 10	Arion (Mesarion) cf. iratii	UK: WALES	Breconshire (VC42)	Talybont Forest near Abercynafon, W end of Talybont Reservoir, Brecon Beacons NP	210	51.8448	-3.34416
128	NMW.Z.2012.041.00004	12BB7	-	KF894076	-	-	ARIONIDAE	9 + 10	Arion (Mesarion) cf. iratii	UK: WALES	Breconshire (VC42)	A470 layby just S of Garwnant turnoff, Coed Taf Fawr FC, N of Llwyn-on village and reservoir	260	51.8032	-3.43865
129	NMW.Z.2011.038.00003	AB4	-	KF894079	-	-	ARIONIDAE	9 + 10	Arion (Mesarion) cf. iratii	UK: WALES	Glamorganshire (VC41)	Coed Groes-faen (W part), N of Bargoed, Darren Valley, Caerphilly County Borough	240	51.6994	-3.24289
130	NMW.Z.2012.041.00073	M1	-	KF894129	-	-	ARIONIDAE	9 + 10	Arion (Mesarion) cf. iratii	UK: WALES	Glamorganshire (VC41)	Mynydd William Meyrick, W end of Clydach Vale Country Park, W of Tonypandy, Rhondda Fawr	375	51.6262	-3.50383
131	NMW.Z.2012.041.00013	12m19	Hap31	KF894103	-	-	ARIONIDAE	11	Arion (Carinarion) circumscriptus	UK: WALES	Glamorganshire (VC41)	Miskin, Rhondda Cynon Taf, W of Cardiff	40	51.5252	-3.38229
132	NMW.Z.2012.041.00015	12m20	Hap31	KF894103	-	-	ARIONIDAE	11	Arion (Carinarion) circumscriptus	UK: WALES	Glamorganshire (VC41)	Miskin, Rhondda Cynon Taf, W of Cardiff	40	51.5252	-3.38229
133	NMW.Z.2012.041.00055	DF12	Hap31	KF894103	-	-	ARIONIDAE	11	Arion (Carinarion) circumscriptus	UK: ENGLAND	Cambridgeshire (VC29)	Wicken, SE of Soham, S of Ely	5	52.3146	0.303259
134	NMW.Z.2012.041.00062	DF4	Hap31	KF894103	-	-	ARIONIDAE	11	Arion (Carinarion) circumscriptus	UK: ENGLAND	Nottinghamshire (VC56)	Beckingham, Trent floodplain W of Gainsborough	15	53.4029	-0.83127
135	NMW.Z.2011.038.00015	EA5	Hap31	KF894103	-	-	ARIONIDAE	11	Arion (Carinarion) circumscriptus	UK: ENGLAND	West Suffolk (VC26)	Great Grove wood, near Sapiston, N of Ixworth, S of Thetford	30	52.3498	0.835201
136	NMW.Z.2011.037.00043	I75	Hap32	KF894104	-	-	ARIONIDAE	11	Arion (Carinarion) circumscriptus	REP. IRELAND	Roscommon (H25)	St. John's Wood, W shore of Loch Ree near Lecarrow, N of Athlone	45	53.5568	-8.00527
137	NMW.Z.2011.037.00057	I99	Hap50	KF894115	-	-	ARIONIDAE	11	Arion (Carinarion) silvaticus	UK: NORTHERN IRELAND	Antrim (H39)	S face of Cave Hill, overlooking N suburbs of Belfast	255	54.643	-5.95894
138	NMW.Z.2011.002.00008	S27	Hap51	KF894116	-	-	ARIONIDAE	11	Arion (Carinarion) silvaticus	UK: SCOTLAND	West Ross & Cromarty (VC105)	Rassall Ashwood NNR, near Kishorn River, NE of Lochcarron	70	57.427	-5.59118
139	NMW.Z.2011.002.00014	S37	Hap51	KF894116	-	-	ARIONIDAE	11	Arion (Carinarion) silvaticus	UK: SCOTLAND	Moray (VC95)	Craigellachie NNR, near Aviemore, Cairngorms NP	210	57.1898	-3.83995
140	NMW.Z.2011.002.00016	S40	Hap51	KF894116	-	-	ARIONIDAE	11	Arion (Carinarion) silvaticus	UK: SCOTLAND	Moray (VC95)	Craigellachie NNR, near Aviemore, Cairngorms NP	210	57.1898	-3.83995
141	NMW.Z.2011.002.00019	S44	Hap32	KF894104	-	-	ARIONIDAE	11	Arion (Carinarion) circumscriptus	UK: SCOTLAND	East Inverness-shire (VC96)	Insh Marshes NNR, near Kingussie, Cairngorms NP	200	57.1024	-3.97595
142	NMW.Z.2011.002.00021	S46	Hap51	KF894116	-	-	ARIONIDAE	11	Arion (Carinarion) silvaticus	UK: SCOTLAND	East Inverness-shire (VC96)	Insh Marshes NNR, near Kingussie, Cairngorms NP	200	57.1024	-3.97595
143	NMW.Z.2012.041.00141	SN19	Hap51	KF894116	-	-	ARIONIDAE	11	Arion (Carinarion) silvaticus	UK: WALES	Caernarvonshire (VC49)	Cwm Idwal NNR, above Nant Ffrancon, S of Bethesda, Snowdonia NP	430	53.1037	-4.02543
144	NMW.Z.2011.038.00060	WF8	Hap51	KF894116	-	-	ARIONIDAE	11	Arion (Carinarion) silvaticus	UK: ENGLAND	Worcestershire (VC37)	Withybed Wood, Wyre Forest NNR, near Callow Hill, W of Kidderminster	75	52.3896	-2.35702
145	NMW.Z.2012.041.00151	WV6	Hap31	KF894103	-	-	ARIONIDAE	11	Arion (Carinarion) circumscriptus	UK: ENGLAND	West Gloucestershire (VC34)	The Slaughter, E of Lady Park Wood NNR, S/E bank of R. Wye, S of Symonds Yat, Wye Valley AONB	60	51.8246	-2.64998
146	NMW.Z.2012.041.00166	Y25	Hap50	KF894115	-	-	ARIONIDAE	11	Arion (Carinarion) silvaticus	UK: ENGLAND	Mid-west Yorkshire (VC64)	Hag Dyke, E of Kettlewell, Wharfedale, Yorkshire Dales NP	400	54.1537	-2.02446
147	NMW.Z.2012.041.00058	DF2	-	KF894087	-	-	ARIONIDAE	12	Arion (Carinarion) fasciatus	UK: ENGLAND	Nottinghamshire (VC56)	Beckingham, Trent floodplain W of Gainsborough	15	53.4029	-0.83127
148	NMW.Z.2012.041.00059	DF21	-	KF894085	-	-	ARIONIDAE	12	Arion (Carinarion) fasciatus	UK: ENGLAND	Nottinghamshire (VC56)	Dyscarr Wood NR (Notts. WT) & Langold Country Park, Langold, N of Worksop	40	53.3749	-1.12966
149	NMW.Z.2012.041.00161	Y19	-	KF894151	-	-	ARIONIDAE	12	Arion (Carinarion) fasciatus	UK: ENGLAND	Mid-west Yorkshire (VC64)	Grass Wood NR (WT), Grassington, Wharfedale, Yorkshire Dales NP	250	54.0872	-2.02442
150	NMW.Z.2012.041.00016	12m21	Hap34	KF894105	-	-	ARIONIDAE	13	Arion (Kobeltia) distinctus	UK: WALES	Glamorganshire (VC41)	Miskin, Rhondda Cynon Taf, W of Cardiff	40	51.5252	-3.38229
151	NMW.Z.2012.041.00060	DF22	-	KF894086	-	-	ARIONIDAE	13	Arion (Kobeltia) distinctus	UK: ENGLAND	Nottinghamshire (VC56)	Dyscarr Wood NR (Notts. WT) & Langold Country Park, Langold, N of Worksop	40	53.3749	-1.12966
152	NMW.Z.2011.038.00028	K21	Hap34	KF894105	-	-	ARIONIDAE	13	Arion (Kobeltia) distinctus	UK: ENGLAND	East Kent (VC15)	Folkestone Warren Country Park, E edge of Folkestone	50	51.0947	1.20337
153	NMW.Z.2011.002.00023	S50	Hap34	KF894105	-	-	ARIONIDAE	13	Arion (Kobeltia) distinctus	UK: SCOTLAND	Moray (VC95)	near Roches Moutonèes picnic area, Dulnain Bridge, Cairngorms NP	210	57.3047	-3.65645
154	NMW.Z.2012.041.00135	SN12	Hap34	KF894105	-	-	ARIONIDAE	13	Arion (Kobeltia) distinctus	UK: WALES	Merionethshire (VC48)	Coed Camlyn NNR, W of Maentwrog, Vale of Ffestiniog, Snowdonia NP	50	52.9387	-3.99985
155	NMW.Z.2011.038.00056	WF2	Hap34	KF894105	-	-	ARIONIDAE	13	Arion (Kobeltia) distinctus	UK: ENGLAND	Worcestershire (VC37)	Withybed Wood, Wyre Forest NNR, near Callow Hill, W of Kidderminster	75	52.3896	-2.35702
156	NMW.Z.2012.041.00153	WV9	Hap35	KF894106	-	-	ARIONIDAE	13	Arion (Kobeltia) distinctus	UK: ENGLAND	West Gloucestershire (VC34)	The Slaughter, E of Lady Park Wood NNR, S/E bank of R. Wye, S of Symonds Yat, Wye Valley AONB	60	51.8246	-2.64998
157	NMW.Z.2012.041.00027	BP1	Hap40	KF894108	-	-	ARIONIDAE	14	Arion (Kobeltia) hortensis	UK: WALES	Glamorganshire (VC41)	Bute Park, Cathays, Cardiff	<50	51.4877	-3.1896
158	NMW.Z.2012.041.00045	DC23	Hap40	KF894108	-	-	ARIONIDAE	14	Arion (Kobeltia) hortensis	UK: ENGLAND	South Devon (VC3)	Exhibition Road, East Town, Crediton	45	50.7934	-3.64436
159	NMW.Z.2011.037.00035	I61	Hap40	KF894108	-	-	ARIONIDAE	14	Arion (Kobeltia) hortensis	REP. IRELAND	West Galway (H16)	S part of Rusheen Bay, E of Knockauncarragh, E of Salthill, Galway city	<10	53.2532	-9.12307
160	NMW.Z.2011.037.00046	I8	Hap40	KF894108	-	-	ARIONIDAE	14	Arion (Kobeltia) hortensis	REP. IRELAND	West Cork (H3)	Schull and environs, near Ballydehob	c10	51.5263	-9.54555
161	NMW.Z.2012.041.00122	PYC7	Hap40	KF894108	-	-	ARIONIDAE	14	Arion (Kobeltia) hortensis	UK: WALES	Glamorganshire (VC41)	Miskin, Rhondda Cynon Taf, W of Cardiff	40	51.5252	-3.38229
162	NMW.Z.2012.041.00152	WV8	Hap40	KF894108	-	-	ARIONIDAE	14	Arion (Kobeltia) hortensis	UK: ENGLAND	West Gloucestershire (VC34)	The Slaughter, E of Lady Park Wood NNR, S/E bank of R. Wye, S of Symonds Yat, Wye Valley AONB	60	51.8246	-2.64998
163	NMW.Z.2012.041.00022	12m7	Hap43	KF894110	-	-	ARIONIDAE	15	Arion (Kobeltia) intermedius	UK: WALES	Breconshire (VC42)	Valley of Blaen Taf Fawr stream, route to Pen y Fan from A470, Brecon Beacons NP	550-600	51.8803	-3.4629
164	NMW.Z.2012.041.00032	DC10	Hap43	KF894110	-	-	ARIONIDAE	15	Arion (Kobeltia) intermedius	UK: ENGLAND	East Cornwall (VC2)	off A30 at Minzies Downs, Bolventor, Bodmin Moor, NE of Bodmin	300	50.5562	-4.57215
165	NMW.Z.2012.041.00057	DF19	-	KF894084	-	-	ARIONIDAE	15	Arion (Kobeltia) intermedius	UK: ENGLAND	Nottinghamshire (VC56)	Barrow Hills Sandpits SSSI, Harwell, Everton, E of Bawtry	30	53.4177	-0.975313
166	NMW.Z.2011.037.00003	I100	Hap43	KF894110	-	-	ARIONIDAE	15	Arion (Kobeltia) intermedius	UK: NORTHERN IRELAND	Antrim (H39)	S face of Cave Hill, overlooking N suburbs of Belfast	255	54.643	-5.95894
167	NMW.Z.2011.037.00005	I12	Hap42	KF894109	-	-	ARIONIDAE	15	Arion (Kobeltia) intermedius	REP. IRELAND	North Kerry (H2)	Muckross Peninsula, W of Cloghereen, Killarney NP	30	52.0212	-9.50865
168	NMW.Z.2011.037.00019	I41	Hap43	KF894110	-	-	ARIONIDAE	15	Arion (Kobeltia) intermedius	REP. IRELAND	North Kerry (H2)	Mangerton Mountain, above Gortagullane, Killarney NP	150-680	51.9792	-9.48977
169	NMW.Z.2011.037.00039	I69	Hap43	KF894110	-	-	ARIONIDAE	15	Arion (Kobeltia) intermedius	REP. IRELAND	West Galway (H16)	around Lettercraffoe Lough, SW of Oughterard, W of Lough Corrib	220	53.3807	-9.38944
170	NMW.Z.2011.038.00024	K17	Hap43	KF894110	-	-	ARIONIDAE	15	Arion (Kobeltia) intermedius	UK: ENGLAND	East Kent (VC15)	Homestall Wood, Blean Woods NNR, E of Rough Common, W of Canterbury	75	51.2942	1.04079
171	NMW.Z.2011.002.00002	S10	Hap43	KF894110	-	-	ARIONIDAE	15	Arion (Kobeltia) intermedius	UK: SCOTLAND	West Ross & Cromarty (VC105)	Meall Fearna, Beinn Eighe NNR, near Kinlochewe	200	57.5942	-5.32975
172	NMW.Z.2011.002.00003	S17	Hap42	KF894109	-	-	ARIONIDAE	15	Arion (Kobeltia) intermedius	UK: SCOTLAND	West Ross & Cromarty (VC105)	An Dùn / An Àrd, S of Gairloch	5	57.7136	-5.6901
173	NMW.Z.2011.002.00004	S19	-	KF894143	-	-	ARIONIDAE	15	Arion (Kobeltia) intermedius	UK: SCOTLAND	West Ross & Cromarty (VC105)	Rassall Ashwood NNR, near Kishorn River, NE of Lochcarron	70	57.427	-5.59118
174	NMW.Z.2011.002.00017	S41	Hap43	KF894110	-	-	ARIONIDAE	15	Arion (Kobeltia) intermedius	UK: SCOTLAND	Moray (VC95)	Craigellachie NNR, near Aviemore, Cairngorms NP	210	57.1898	-3.83995
175	NMW.Z.2012.041.00145	SN5	Hap43	KF894110	-	-	ARIONIDAE	15	Arion (Kobeltia) intermedius	UK: WALES	Merionethshire (VC48)	Roman Steps, N of Rhinog Fawr, Rhinogau NNR, W of Trawsfynydd, Snowdonia NP	460	52.8507	-3.99283
176	NMW.Z.2011.038.00054	WF11	Hap43	KF894110	-	-	ARIONIDAE	15	Arion (Kobeltia) intermedius	UK: ENGLAND	Worcestershire (VC37)	Withybed Wood, Wyre Forest NNR, near Callow Hill, W of Kidderminster	75	52.3896	-2.35702
177	NMW.Z.2011.038.00062	WW2	Hap43	KF894110	-	-	ARIONIDAE	15	Arion (Kobeltia) intermedius	UK: ENGLAND	South Devon (VC3)	Wistman’s Wood NNR, N of Two Bridges, Dartmoor NP, E of Tavistock	410	50.5771	-3.96167
178	NMW.Z.2012.041.00160	Y17	Hap43	KF894110	-	-	ARIONIDAE	15	Arion (Kobeltia) intermedius	UK: ENGLAND	South-east Yorkshire (VC61)	Braisthwaite Bridge, Howsham Woods, N of Stamford Bridge, E of York	20	54.0524	-0.891022
179	NMW.Z.2003.092.00002	OCC	Hap47	KF894113	-	-	ARIONIDAE	16	Arion (Kobeltia) occultus	UK: NORTHERN IRELAND	Co. Down (H38)	Ballywalter, SE of Newtownards	<50	54.5397	-5.48652
180	NMW.Z.2012.041.00131	ROY7	-	KF894142	-	-	ARIONIDAE	16	Arion (Kobeltia) occultus	UK: NORTHERN IRELAND	Co. Down (H38)	Ballywalter, SE of Newtownards	<50	54.5397	-5.48652
181	NMW.Z.2012.041.00132	ROY9	Hap47	KF894113	-	-	ARIONIDAE	16	Arion (Kobeltia) occultus	UK: NORTHERN IRELAND	Co. Down (H38)	Ballywalter, SE of Newtownards	<50	54.5397	-5.48652
182	NMW.Z.2012.041.00030	CYB1	Hap46	KF894112	-	-	ARIONIDAE	17	Arion (Kobeltia) owenii	UK: WALES	Glamorgan (VC41)	Coed-y-Bedw NR (WTSWW), E of Pentyrch, N of Cardiff	100	51.4841	-3.28024
183	NMW.Z.2012.041.00048	DC5	Hap46	KF894112	-	-	ARIONIDAE	17	Arion (Kobeltia) owenii	UK: ENGLAND	South Devon (VC3)	Exhibition Road, East Town, Crediton	45	50.7934	-3.64436
184	NMW.Z.2011.038.00009	DN7	Hap45	KF894111	-	-	ARIONIDAE	17	Arion (Kobeltia) owenii	UK: WALES	Denbighshire (VC50)	Pontfadog, Ceiriog Valley, SE of Llangollen	200	52.9311	-3.14995
185	NMW.Z.2011.037.00028	I52	Hap46	KF894112	-	-	ARIONIDAE	17	Arion (Kobeltia) owenii	REP. IRELAND	West Galway (H16)	E end of Rusheen Bay, Knocknacarra, E of Salthill, Galway city	<10	53.2587	-9.10972
186	NMW.Z.2012.041.00107	NF16	Hap46	KF894112	-	-	ARIONIDAE	17	Arion (Kobeltia) owenii	UK: ENGLAND	South Wiltshire (VC8)	Ivy Wood, E of Lymington River, E of Brockenhurst, New Forest NP	10	50.8203	-1.55277
187	NMW.Z.2014.001.00019	Ret2	Hap45	KF894111	-	-	ARIONIDAE	17	Arion (Kobeltia) owenii	UK: SCOTLAND	Outer Hebrides (VC110)	Pollachar House, South Uist	10	57.1033	-7.37452
188	NMW.Z.2011.038.00047	SK8	Hap46	KF894112	-	-	ARIONIDAE	17	Arion (Kobeltia) owenii	UK: WALES	Glamorganshire (VC41)	S of Tircoed, Penllergaer Forest, NE of Gorseinon	70	51.6783	-3.99011
189	NMW.Z.2012.041.00164	Y21	Hap46	KF894112	-	-	ARIONIDAE	17	Arion (Kobeltia) owenii	UK: ENGLAND	Staffordshire (VC39)	Green Meadow Animal Sanctuary, Pattingham, W of Wolverhampton	110	52.5832	-2.24495
190	NMW.Z.2012.041.00017	12m22	-	KF894077	-	-	ARIONIDAE	18	Arion (Kobeltia) cf. fagophilus	UK: WALES	Glamorganshire (VC41)	Miskin, Rhondda Cynon Taf, W of Cardiff	40	51.5252	-3.38229
191	NMW.Z.2012.041.00028	BP2	-	KF894082	-	-	ARIONIDAE	18	Arion (Kobeltia) cf. fagophilus	UK: WALES	Glamorganshire (VC41)	Bute Park, Cathays, Cardiff	<50	51.4877	-3.1896
192	NMW.Z.2012.041.00029	BP3	-	KF894083	-	-	ARIONIDAE	18	Arion (Kobeltia) cf. fagophilus	UK: WALES	Glamorganshire (VC41)	Bute Park, Cathays, Cardiff	<50	51.4877	-3.1896
193	NMW.Z.2012.041.00123	PYC8	-	KF894140	-	-	ARIONIDAE	18	Arion (Kobeltia) cf. fagophilus	UK: WALES	Glamorganshire (VC41)	Tyle-garw, W of Pontyclun, Rhondda Cynon Taf, W of Cardiff	45	51.5222	-3.40094
194	NMW.Z.2011.037.00020	I42	Hap52	KF894117	-	-	ARIONIDAE	19	Geomalacus maculosus	REP. IRELAND	South Kerry (H1)	Glenbeigh Wood, above road bridge to between Glenbeigh & Rossbehy, near Loch Caragh	30	52.0534	-9.94717
195	NMW.Z.2011.037.00021	I43	Hap52	KF894117	-	-	ARIONIDAE	19	Geomalacus maculosus	REP. IRELAND	South Kerry (H1)	Moll's Gap viewpoint at junction of N71 & R568	260	51.941	-9.65722
196	NMW.Z.2011.037.00023	I45	Hap52	KF894117	-	-	ARIONIDAE	19	Geomalacus maculosus	REP. IRELAND	North Kerry (H2)	Derricunihy Woods, NE of Lady's View along road, Killarney NP	155	51.9799	-9.57422
197	NMW.Z.2011.037.00024	I46	Hap52	KF894117	-	-	ARIONIDAE	19	Geomalacus maculosus	REP. IRELAND	North Kerry (H2)	Derricunihy Woods, NE of Lady's View along road, Killarney NP	155	51.9799	-9.57422
198	NMW.Z.2012.041.00003	12BB5	-	-	KF894220	-	LIMACIDAE	20	Limax cinereoniger	UK: WALES	Breconshire (VC42)	Talybont Forest near Abercynafon, W end of Talybont Reservoir, Brecon Beacons NP	210	51.8448	-3.34416
199	NMW.Z.2012.041.00018	12m23	-	-	KF894227	-	LIMACIDAE	20	Limax cinereoniger	UK: ENGLAND	South-west Yorkshire (VC63)	Howell Wood, South Kirby	90	53.574	-1.33852
200	NMW.Z.2011.038.00002	AB3	Hap55	-	KF894257	-	LIMACIDAE	20	Limax cinereoniger	UK: WALES	Glamorganshire (VC41)	Coed Groes-faen (E part), N of Bargoed, Darren Valley, Caerphilly County Borough	220	51.6994	-3.24289
201	NMW.Z.2012.041.00026	AN1	-	-	KF894231	-	LIMACIDAE	20	Limax cinereoniger	UK: ENGLAND	South Hampshire (VC11)	Baddesley Common, North Baddesley, N of Southampton	40	50.9844	-1.45005
202	NMW.Z.2012.041.00034	DC12	-	-	KF894232	-	LIMACIDAE	20	Limax cinereoniger	UK: ENGLAND	East Cornwall (VC2)	North Hill Wood, Luxulyan Valley, SE of Luxulyan, NE of St. Austell	80	50.379	-4.72994
203	NMW.Z.2011.037.00017	I37	Hap55	-	KF894257	-	LIMACIDAE	20	Limax cinereoniger	REP. IRELAND	North Kerry (H2)	Torc Waterfalls, Killarney NP	65	52.0047	-9.52994
204	NMW.Z.2011.037.00037	I64	-	-	KF894284	-	LIMACIDAE	20	Limax cinereoniger	REP. IRELAND	West Galway (H16)	around Lettercraffoe Lough, SW of Oughterard, W of Lough Corrib	220	53.3807	-9.38944
205	NMW.Z.2011.037.00056	I98	-	-	KF894291	-	LIMACIDAE	20	Limax cinereoniger	REP. IRELAND	Roscommon (H25)	St. John's Wood, W shore of Loch Ree near Lecarrow, N of Athlone	45	53.5568	-8.00527
206	NMW.Z.2011.038.00019	K1	-	-	KF894295	-	LIMACIDAE	20	Limax cinereoniger	UK: ENGLAND	East Kent (VC15)	Grimshill Wood, Blean Woods NNR, E of Blean, NW of Canterbury	85	51.3062	1.0301
207	NMW.Z.2012.041.00083	M21	-	-	KF894305	-	LIMACIDAE	20	Limax cinereoniger	UK: WALES	Pembrokeshire (VC45)	Ty Canol NNR, Pentre Ifan, W of Eglwyswrw, Mynydd Preseli	110	52.0013	-4.77951
208	NMW.Z.2014.001.00010	M44	-	-	KF894317	-	LIMACIDAE	20	Limax cinereoniger	UK: SCOTLAND	Moray (VC95)	Glenmore Forest Park, near Aviemore, Cairngorms NP	320	57.16	-3.69
209	NMW.Z.2009.030.00003	Ret4	-	-	KF894339	-	LIMACIDAE	20	Limax cinereoniger	UK: ENGLAND	South Hampshire (VC11)	West Wood, W of Winchester	100	51.0688	-1.41195
210	NMW.Z.2011.002.00012	S35	-	-	KF894347	-	LIMACIDAE	20	Limax cinereoniger	UK: SCOTLAND	Moray (VC95)	Craigellachie NNR, near Aviemore, Cairngorms NP	210	57.1898	-3.83995
211	NMW.Z.2011.002.00028	S6	-	-	KF894353	-	LIMACIDAE	20	Limax cinereoniger	UK: SCOTLAND	West Ross & Cromarty (VC105)	Coille na Glas-Leitire, Beinn Eighe NNR, near Kinlochewe	80	57.6295	-5.3531
212	NMW.Z.2012.041.00149	SN9	-	-	KF894365	-	LIMACIDAE	20	Limax cinereoniger	UK: WALES	Caernarvonshire (VC49)	near Pencraig, NE of Betws-y-Coed, Snowdonia NP	200	53.1068	-3.83584
213	NMW.Z.2011.038.00058	WF5	-	-	KF894371	-	LIMACIDAE	20	Limax cinereoniger	UK: ENGLAND	Worcestershire (VC37)	New Parks Wood, Wyre Forest NNR, near Callow Hill, W of Kidderminster	100	52.3787	-2.38338
214	NMW.Z.2012.041.00170	Y31	-	-	KF894380	-	LIMACIDAE	20	Limax cinereoniger	UK: ENGLAND	North-east Yorkshire (VC62)	Sutton Bank, Hambleton Hills, W of Thirsk North Yorks Moors NP	280	54.2383	-1.2098
215	NMW.Z.2012.041.00010	12m16	-	-	KF894224	-	LIMACIDAE	21	Limax maximus	UK: ENGLAND	South Hampshire (VC11)	Whitley Wood, near Lyndhurst, New Forest NP	50	50.8581	-1.57514
216	NMW.Z.2012.041.00035	DC13	Hap58	-	KF894258	-	LIMACIDAE	21	Limax maximus	UK: ENGLAND	East Cornwall (VC2)	North Hill Wood, Luxulyan Valley, SE of Luxulyan, NE of St. Austell	80	50.379	-4.72994
217	NMW.Z.2012.041.00036	DC14	Hap58	-	KF894258	-	LIMACIDAE	21	Limax maximus	UK: ENGLAND	South Devon (VC3)	Exhibition Road, East Town, Crediton	45	50.7934	-3.64436
218	NMW.Z.2011.038.00011	EA1	-	-	KF894246	-	LIMACIDAE	21	Limax maximus	UK: ENGLAND	West Suffolk (VC26)	Great Grove wood, near Sapiston, N of Ixworth, S of Thetford	30	52.3498	0.835201
219	NMW.Z.2011.038.00017	EA7	-	-	KF894249	-	LIMACIDAE	21	Limax maximus	UK: ENGLAND	East Norfolk (VC27)	Wheatfen Broad/Ted Ellis Trust NR, Norfolk & Suffolk Broads NP, Surlingham, SE of Norwich	<10	52.5974	1.43456
220	NMW.Z.2011.038.00018	EA8	-	-	KF894250	-	LIMACIDAE	21	Limax maximus	UK: ENGLAND	West Suffolk (VC26)	Great Grove wood, near Sapiston, N of Ixworth, S of Thetford	30	52.3498	0.835201
221	NMW.Z.2011.037.00030	I56	-	-	KF894279	-	LIMACIDAE	21	Limax maximus	REP. IRELAND	South-east Galway (H15)	Coole Lough, near Gort, E edge of the Burren area	150	53.092	-8.84119
222	NMW.Z.2011.037.00050	I89	-	-	KF894289	-	LIMACIDAE	21	Limax maximus	UK: NORTHERN IRELAND	Fermanagh (H33)	Florence Court Demesne, near Gortnacally, SW of Enniskillen	90	54.2592	-7.73065
223	NMW.Z.2012.041.00125	REH1	-	-	KF894336	-	LIMACIDAE	21	Limax maximus	UK: ENGLAND	Worcestershire (VC37)	South Copse, Highbury Park, King's Heath, S Birmingham	c50	52.4368	-1.89993
224	NMW.Z.2011.002.00009	S28	-	-	KF894345	-	LIMACIDAE	21	Limax maximus	UK: SCOTLAND	West Ross & Cromarty (VC105)	Rassall Ashwood NNR, near Kishorn River, NE of Lochcarron	70	57.427	-5.59118
225	NMW.Z.2011.038.00044	SK2	-	-	KF894355	-	LIMACIDAE	21	Limax maximus	UK: WALES	Pembrokeshire (VC45)	Skomer Island NNR, Pembrokeshire Coast NP	20-60	51.738	-5.29351
226	NMW.Z.2012.041.00139	SN17	-	-	KF894359	-	LIMACIDAE	21	Limax maximus	UK: WALES	Merionethshire (VC48)	Grounds of Plas Tan-y-Bwlch, N of Maentwrog, Vale of Ffestiniog, Snowdonia NP	60	52.9468	-4.00171
227	NMW.Z.2012.041.00150	WV3	-	-	KF894373	-	LIMACIDAE	21	Limax maximus	UK: ENGLAND	West Gloucestershire (VC34)	The Slaughter, E of Lady Park Wood NNR, S/E bank of R. Wye, S of Symonds Yat, Wye Valley AONB	60	51.8246	-2.64998
228	NMW.Z.2012.041.00179	Y7	-	-	KF894386	-	LIMACIDAE	21	Limax maximus	UK: ENGLAND	North-east Yorkshire (VC62)	Buttercrambe Moor Woods, N of Stamford Bridge, E of York	15	54.0015	-0.918314
229	NMW.Z.2012.041.00175	Y39	-	-	KF894382	-	LIMACIDAE	22	Limax cf. dacampi	UK: ENGLAND	North-east Yorkshire (VC62)	Fylingthorpe, Robin Hood's Bay, North York Moors NP	135	54.4255	-0.558821
230	NMW.Z.2012.041.00176	Y40	-	-	KF894384	-	LIMACIDAE	22	Limax cf. dacampi	UK: ENGLAND	North-east Yorkshire (VC62)	Fylingthorpe, Robin Hood's Bay, North York Moors NP	135	54.4255	-0.558821
231	NMW.Z.2012.041.00076	M15	-	-	KF894301	-	LIMACIDAE	23	Limacus maculatus (hybrid?)	UK: SCOTLAND	Ayrshire (VC75)	Eglinton Terrace, central Ayr	<10	55.4634	-4.63825
232	NMW.Z.2012.041.00080	M19	-	-	KF894304	-	LIMACIDAE	23	Limacus flavus	UK: ENGLAND	South Devon (VC3)	East Street, Crediton	50	50.7897	-3.65133
233	NMW.Z.2011.038.00039	OL1	-	-	KF894331	-	LIMACIDAE	23	Limacus flavus	UK: ENGLAND	Middlesex (VC21)	Oliver's Island, R. Thames E of Kew Bridge, Chiswick, central London	<5	51.4848	-0.281813
234	NMW.Z.2012.041.00140	SN18	-	-	KF894360	-	LIMACIDAE	23	Limacus maculatus (hybrid?)	UK: WALES	Merionethshire (VC48)	Grounds of Plas Tan-y-Bwlch, N of Maentwrog, Vale of Ffestiniog, Snowdonia NP	60	52.9468	-4.00171
235	NMW.Z.2011.038.00049	SW1	-	-	KF894366	-	LIMACIDAE	23	Limacus maculatus (hybrid?)	UK: WALES	Glamorganshire (VC41)	Pontyclun, Rhondda Cynon Taf, W of Cardiff	55	51.5251	-3.38806
236	NMW.Z.2012.041.00168	Y3	-	-	KF894383	-	LIMACIDAE	23	Limacus maculatus	UK: ENGLAND	Mid-west Yorkshire (VC64)	Kettlewell, Wharfedale, Yorkshire Dales NP	220	54.1465	-2.04742
237	NMW.Z.2012.041.00011	12m17	-	-	KF894225	-	LIMACIDAE	24	Limacus maculatus	UK: ENGLAND	South Hampshire (VC11)	Whitley Wood, near Lyndhurst, New Forest NP	50	50.8572	-1.57657
238	NMW.Z.2012.041.00053	DF10	-	-	KF894240	-	LIMACIDAE	24	Limacus maculatus	UK: ENGLAND	Cambridgeshire (VC29)	Wicken, SE of Soham, S of Ely	5	52.3146	0.303259
239	NMW.Z.2011.037.00009	I20	-	-	KF894272	-	LIMACIDAE	24	Limacus maculatus	REP. IRELAND	East Cork (H5)	Near Rostellan, E coast of Cork Harbour	35	51.8536	-8.1836
240	NMW.Z.2011.037.00027	I51	-	-	KF894278	-	LIMACIDAE	24	Limacus maculatus	REP. IRELAND	South-east Galway (H15)	Coole Lough, near Gort, E edge of the Burren area	150	53.092	-8.84119
241	NMW.Z.2014.001.00011	M45	-	-	KF894318	-	LIMACIDAE	24	Limacus maculatus	UKRAINE	Crimea	Chatyrdagh, SE of Simferopol, southern Crimea	990	44.79	34.29
242	NMW.Z.2013.072.00019	M60	-	-	KF894321	-	LIMACIDAE	24	Limacus maculatus	UK: ENGLAND	Surrey (VC17)	Lambeth, C London	15	51.49	-0.11
243	NMW.Z.2013.072.00020	M61	-	-	KF894322	-	LIMACIDAE	24	Limacus maculatus	UK: ENGLAND	Surrey (VC17)	Lambeth, C London	15	51.49	-0.11
244	NMW.Z.2011.038.00036	NL2	-	-	KF894330	-	LIMACIDAE	24	Limacus maculatus	UK: ENGLAND	North Lincolnshire (VC54)	Market Rasen, NE of Lincoln	25	53.3774	-0.347901
245	NMW.Z.2012.041.00117	PGO4	-	-	KF894334	-	LIMACIDAE	24	Limacus maculatus	UK: WALES	Glamorgan (VC41)	Romilly Road, Canton, Cardiff	<50	51.4848	-3.20825
246	NMW.Z.2012.041.00124	RADC1	-	-	KF894335	-	LIMACIDAE	24	Limacus maculatus	UK: ENGLAND	South-west Yorkshire (VC63)	Rivelin Valley, W of Sheffield	150	53.3812	-1.67224
247	NMW.Z.2011.038.00050	SW2	-	-	KF894367	-	LIMACIDAE	24	Limacus maculatus	UK: WALES	Glamorganshire (VC41)	Slade Wood, Southerndown, near Ogmore-by-Sea	30	51.4487	-3.60016
248	NMW.Z.2012.041.00002	12BB2	-	-	KF894219	-	LIMACIDAE	25	Lehmannia marginata	UK: WALES	Breconshire (VC42)	Llyn y Fan Fawr, foot of Fan Brycheiniog, N of Glyntawe, Black Mountains, Brecon Beacons NP	620	51.8806	-3.70263
249	NMW.Z.2012.041.00007	12m13	-	-	KF894221	-	LIMACIDAE	25	Lehmannia marginata	REP. IRELAND	North Kerry (H2)	Mangerton Mountain, above Gortagullane, Killarney NP	150-680	51.9792	-9.48977
250	NMW.Z.2012.041.00039	DC17	-	-	KF894234	-	LIMACIDAE	25	Lehmannia marginata	UK: ENGLAND	East Cornwall (VC2)	North Hill Wood, Luxulyan Valley, SE of Luxulyan, NE of St. Austell	80	50.379	-4.72994
251	NMW.Z.2012.041.00047	DC4	-	-	KF894239	-	LIMACIDAE	25	Lehmannia marginata	UK: ENGLAND	West Cornwall (VC1)	above Porthmeor Beach, W of St. Ives	20	50.2156	-5.49027
252	NMW.Z.2012.041.00056	DF14	-	-	KF894242	-	LIMACIDAE	25	Lehmannia marginata	UK: ENGLAND	Nottinghamshire (VC56)	Sherwood Forest NNR, Edwinstowe, Sherwood Forest area	65	53.2	-1.06734
253	NMW.Z.2011.038.00016	EA6	-	-	KF894248	-	LIMACIDAE	25	Lehmannia marginata	UK: ENGLAND	East Norfolk (VC27)	Wheatfen Broad/Ted Ellis Trust NR, Norfolk & Suffolk Broads NP, Surlingham, SE of Norwich	<10	52.5974	1.43456
254	NMW.Z.2011.037.00004	I11	-	-	KF894270	-	LIMACIDAE	25	Lehmannia marginata	REP. IRELAND	North Kerry (H2)	Muckross Peninsula, W of Cloghereen, Killarney NP	30	52.0212	-9.50865
255	NMW.Z.2011.037.00008	I15	-	-	KF894271	-	LIMACIDAE	25	Lehmannia marginata	REP. IRELAND	East Cork (H5)	Near Rostellan, E coast of Cork Harbour	35	51.8536	-8.1836
256	NMW.Z.2011.037.00012	I29	-	-	KF894274	-	LIMACIDAE	25	Lehmannia marginata	REP. IRELAND	North Kerry (H2)	Mangerton Mountain, above Gortagullane, Killarney NP	150-680	51.9792	-9.48977
257	NMW.Z.2011.037.00036	I62	-	-	KF894283	-	LIMACIDAE	25	Lehmannia marginata	REP. IRELAND	West Galway (H16)	S part of Rusheen Bay, E of Knockauncarragh, E of Salthill, Galway city	<10	53.2532	-9.12307
258	NMW.Z.2011.037.00048	I83	-	-	KF894288	-	LIMACIDAE	25	Lehmannia marginata	UK: NORTHERN IRELAND	Antrim (H39)	Belvoir Park Forest, Lagan Valley Regional Park, S suburbs of Belfast	35	54.5571	-5.92922
259	NMW.Z.2011.038.00021	K13	-	-	KF894292	-	LIMACIDAE	25	Lehmannia marginata	UK: ENGLAND	East Kent (VC15)	Grimshill Wood, Blean Woods NNR, E of Blean, NW of Canterbury	85	51.3062	1.0301
260	NMW.Z.2011.038.00034	K9	-	-	KF894298	-	LIMACIDAE	25	Lehmannia marginata	UK: ENGLAND	West Kent (VC16)	One Tree Hill (National Trust), N of Underriver, E of Sevenoaks	165	51.2575	0.234257
261	NMW.Z.2012.041.00071	L4	-	-	KF894299	-	LIMACIDAE	25	Lehmannia marginata	UK: ENGLAND	Westmorland (VC69)	Moss Rigg Wood, W of Ambleside, Lake District NP	150	54.4133	-3.06007
262	NMW.Z.2012.041.00102	MRW1	-	-	KF894325	-	LIMACIDAE	25	Lehmannia marginata	UK: SCOTLAND	Outer Hebrides (VC110)	Asgeirnis, South Uist	10	57.19	-7.4
263	NMW.Z.2012.041.00112	NF5	-	-	KF894329	-	LIMACIDAE	25	Lehmannia marginata	UK: ENGLAND	South Wiltshire (VC8)	Rufus Stone area, Upper Canterton, NE of Minstead, New Forest NP	85	50.9095	-1.61592
264	NMW.Z.2011.002.00026	S57	-	-	KF894350	-	LIMACIDAE	25	Lehmannia marginata	UK: SCOTLAND	Mid Perthshire (VC88)	hill above Easter Moncreiffe, N of Bridge of Earn, S of Perth	50	56.3601	-3.37893
265	NMW.Z.2011.038.00045	SK3	-	-	KF894356	-	LIMACIDAE	25	Lehmannia marginata	UK: WALES	Pembrokeshire (VC45)	Skomer Island NNR, Pembrokeshire Coast NP	60	51.7348	-5.31067
266	NMW.Z.2011.038.00046	SK6	-	-	KF894357	-	LIMACIDAE	25	Lehmannia marginata	UK: WALES	Pembrokeshire (VC45)	Skomer Island NNR, Pembrokeshire Coast NP	20-60	51.738	-5.29351
267	NMW.Z.2012.041.00138	SN16	-	-	KF894358	-	LIMACIDAE	25	Lehmannia marginata	UK: WALES	Merionethshire (VC48)	Grounds of Plas Tan-y-Bwlch, N of Maentwrog, Vale of Ffestiniog, Snowdonia NP	60	52.9468	-4.00171
268	NMW.Z.2012.041.00143	SN3	-	-	KF894361	-	LIMACIDAE	25	Lehmannia marginata	UK: WALES	Caernarvonshire (VC49)	Cwm Idwal NNR, above Nant Ffrancon, S of Bethesda, Snowdonia NP	430	53.1037	-4.02543
269	NMW.Z.2011.038.00051	SW3	-	-	KF894368	-	LIMACIDAE	25	Lehmannia marginata	UK: WALES	Glamorganshire (VC41)	Slade Wood, Southerndown, near Ogmore-by-Sea	30	51.4487	-3.60016
270	NMW.Z.2011.038.00059	WF7	-	-	KF894372	-	LIMACIDAE	25	Lehmannia marginata	UK: ENGLAND	Worcestershire (VC37)	New Parks Wood, Wyre Forest NNR, near Callow Hill, W of Kidderminster	100	52.3787	-2.38338
271	NMW.Z.2012.041.00159	Y16	-	-	KF894377	-	LIMACIDAE	25	Lehmannia marginata	UK: ENGLAND	Mid-west Yorkshire (VC64)	Middle Pasture NT, N of Cray, N of Buckden, Yorkshire Dales NP	490	54.222	-2.09659
272	NMW.Z.2011.037.00016	I35	-	-	KF894276	-	LIMACIDAE	26	Ambigolimax valentianus	REP. IRELAND	Mid Cork (H4)	Near Booleypatrick, near Blarney	55	51.9332	-8.58379
273	NMW.Z.2011.037.00032	I59	-	-	KF894281	-	LIMACIDAE	26	Ambigolimax valentianus	REP. IRELAND	West Galway (H16)	E end of Rusheen Bay, Knocknacarra, E of Salthill, Galway city	<10	53.2587	-9.10972
274	NMW.Z.2011.037.00053	I92	-	-	KF894290	-	LIMACIDAE	26	Ambigolimax valentianus	UK: NORTHERN IRELAND	Antrim (H39)	Belvoir Park Forest, Lagan Valley Regional Park, S suburbs of Belfast	35	54.5571	-5.92922
275	NMW.Z.2012.041.00111	NF4	-	-	KF894328	-	LIMACIDAE	26	Ambigolimax valentianus	UK: ENGLAND	South Wiltshire (VC8)	Butts Allotments, E of River Avon, Salisbury	50	51.0809	-1.80295
276	NMW.Z.2011.038.00040	OL2	-	-	KF894332	-	LIMACIDAE	26	Ambigolimax valentianus	UK: ENGLAND	Middlesex (VC21)	Oliver's Island, R. Thames E of Kew Bridge, Chiswick, central London	<5	51.4848	-0.281813
277	NMW.Z.2012.041.00128	ROY4	-	-	KF894341	-	LIMACIDAE	26	Ambigolimax valentianus	GREECE	Crete	Kavros (raised from eggs laid by an individual collected in Kavros in 2011)	10	35.35	24.3
278	NMW.Z.2012.041.00041	DC2	-	-	KF894237	-	LIMACIDAE	27	Ambigolimax nyctelius	UK: ENGLAND	South Devon (VC3)	East Street, Crediton	50	50.7897	-3.65133
279	NMW.Z.2012.041.00046	DC3	-	-	KF894238	-	LIMACIDAE	27	Ambigolimax nyctelius	UK: ENGLAND	South Devon (VC3)	East Street, Crediton	50	50.7897	-3.65133
280	NMW.Z.2013.072.00005	GB1	-	-	KF894251	-	LIMACIDAE	27	Ambigolimax nyctelius	UK: SCOTLAND	Lanarkshire (VC77)	Glasgow Botanical Gardens, Kelvinside, Glasgow	50	55.88	-4.29
281	NMW.Z.2013.072.00007	GB3	-	-	KF894253	-	LIMACIDAE	27	Ambigolimax nyctelius	UK: SCOTLAND	Lanarkshire (VC77)	Glasgow Botanical Gardens, Kelvinside, Glasgow	50	55.88	-4.29
282	NMW.Z.2013.072.00008	GB4	-	-	KF894254	-	LIMACIDAE	27	Ambigolimax nyctelius	UK: SCOTLAND	Lanarkshire (VC77)	Glasgow Botanical Gardens, Kelvinside, Glasgow	50	55.88	-4.29
283	NMW.Z.2012.041.00078	M17	-	-	KF894302	-	LIMACIDAE	27	Ambigolimax nyctelius	UK: ENGLAND	South Devon (VC3)	East Street, Crediton	50	50.7897	-3.65133
284	NMW.Z.2012.041.00079	M18	-	-	KF894303	-	LIMACIDAE	27	Ambigolimax nyctelius	UK: ENGLAND	South Devon (VC3)	Heywood Drive, Starcross, S of Exeter	10	50.6277	-3.45336
285	NMW.Z.2012.041.00114	PGO1	-	-	KF894333	-	LIMACIDAE	27	Ambigolimax nyctelius	UK: WALES	Glamorgan (VC41)	Canton, Cardiff	<50	51.4848	-3.20825
286	NMW.Z.2011.038.00033	K8	-	-	KF894297	-	LIMACIDAE	28	Malacolimax tenellus	UK: ENGLAND	West Kent (VC16)	One Tree Hill (National Trust), N of Underriver, E of Sevenoaks	165	51.26	0.23
287	NMW.Z.2011.002.00022	S47	-	-	KF894349	-	LIMACIDAE	28	Malacolimax tenellus	UK: SCOTLAND	Moray (VC95)	near Roches Moutonèes picnic area, Dulnain Bridge, Cairngorms NP	210	57.3047	-3.65645
288	NMW.Z.2011.038.00052	WF1	-	-	KF894369	-	LIMACIDAE	28	Malacolimax tenellus	UK: ENGLAND	Worcestershire (VC37)	New Parks Wood, Wyre Forest NNR, near Callow Hill, W of Kidderminster	100	52.3787	-2.38338
289	NMW.Z.2012.041.00167	Y28	-	-	KF894379	-	LIMACIDAE	28	Malacolimax tenellus	UK: ENGLAND	North-east Yorkshire (VC62)	Baxton's Wood, N of Carlton, Helmsley, North Yorks Moors NP	220	54.2903	-1.06132
290	NMW.Z.2011.038.00014	EA4	-	-	KF894247	-	AGRIOLIMACIDAE	29	Deroceras agreste	UK: ENGLAND	East Norfolk (VC27)	Wheatfen Broad/Ted Ellis Trust NR, Norfolk & Suffolk Broads NP, Surlingham, SE of Norwich	<10	52.6011	1.43189
291	NMW.Z.2011.037.00047	I81	-	-	KF894287	-	AGRIOLIMACIDAE	29	Deroceras reticulatum (hybrid?)	UK: NORTHERN IRELAND	Fermanagh (H33)	Florence Court Demesne, near Gortnacally, SW of Enniskillen	90	54.2592	-7.73065
292	NMW.Z.2012.041.00093	M34	-	-	KF894312	-	AGRIOLIMACIDAE	29	Deroceras agreste	UK: WALES	Breconshire (VC42)	Base of Craig y Fro, W of Storey Arms, Brecon Beacons NP	400	51.8754	-3.4947
293	NMW.Z.2012.041.00094	M35	-	-	KF894313	-	AGRIOLIMACIDAE	29	Deroceras reticulatum (hybrid?)	UK: WALES	Breconshire (VC42)	Base of Craig y Fro, W of Storey Arms, Brecon Beacons NP	400	51.8754	-3.4947
294	NMW.Z.2011.002.00011	S33	-	-	KF894346	-	AGRIOLIMACIDAE	29	Deroceras agreste	UK: SCOTLAND	East Inverness-shire (VC96)	Roadside of B9154 near Daviot, above River Nairn, SE of Inverness	170	57.4206	-4.1313
295	NMW.Z.2012.041.00144	SN4	-	-	KF894362	-	AGRIOLIMACIDAE	29	Deroceras reticulatum (hybrid?)	UK: WALES	Breconshire (VC42)	Craig Carreg-Gleisiad & Fan Frynych NNR, NW of Storey Arms Centre, Brecon Beacons NP	500	51.886	-3.50958
296	NMW.Z.2012.041.00157	Y13	-	-	KF894375	-	AGRIOLIMACIDAE	29	Deroceras agreste	UK: ENGLAND	Mid-west Yorkshire (VC64)	Middle Pasture NT, N of Cray, N of Buckden, Yorkshire Dales NP	490	54.222	-2.09659
297	NMW.Z.2012.041.00158	Y15	-	-	KF894376	-	AGRIOLIMACIDAE	29	Deroceras reticulatum (hybrid?)	UK: ENGLAND	Mid-west Yorkshire (VC64)	Middle Pasture NT, N of Cray, N of Buckden, Yorkshire Dales NP	490	54.222	-2.09659
298	NMW.Z.2012.041.00005	12m1	Hap84	-	KF894264	-	AGRIOLIMACIDAE	30	Deroceras reticulatum	UK: WALES	Glamorganshire (VC41)	Pontyclun, Rhondda Cynon Taf, W of Cardiff	55	51.5251	-3.38806
299	NMW.Z.2012.041.00043	DC21	-	-	KF894235	-	AGRIOLIMACIDAE	30	Deroceras reticulatum	UK: ENGLAND	West Cornwall (VC1)	above Porthmeor Beach, W of St. Ives	20	50.2156	-5.49027
300	NMW.Z.2011.037.00002	I10	-	-	KF894269	-	AGRIOLIMACIDAE	30	Deroceras reticulatum	REP. IRELAND	South Kerry (H1)	Moll's Gap viewpoint at junction of N71 & R568	260	51.941	-9.65722
301	NMW.Z.2011.037.00041	I70	Hap84	-	KF894264	-	AGRIOLIMACIDAE	30	Deroceras reticulatum	REP. IRELAND	West Galway (H16)	Spiddal churchyard and surrounding coastal areas, W of Galway city	<10	53.2432	-9.30708
302	NMW.Z.2011.038.00023	K15	-	-	KF894293	-	AGRIOLIMACIDAE	30	Deroceras reticulatum	UK: ENGLAND	East Kent (VC15)	Grimshill Wood, Blean Woods NNR, E of Blean, NW of Canterbury	85	51.3062	1.0301
303	NMW.Z.2012.041.00087	M29	-	-	KF894308	-	AGRIOLIMACIDAE	30	Deroceras reticulatum	UK: WALES	Glamorganshire (VC41)	Clun Avenue, Pontyclun, Rhondda Cynon Taf, W of Cardiff	55	51.5242	-3.38659
304	NMW.Z.2013.072.00009	M50	Hap83	-	KF894263	-	AGRIOLIMACIDAE	30	Deroceras reticulatum	UK: NORTHERN IRELAND	Co. Tyrone (H36)	Parkanaur Forest Park, W of Dungannon	105	54.49	-6.86
305	NMW.Z.2011.002.00020	S45	Hap83	-	KF894263	-	AGRIOLIMACIDAE	30	Deroceras reticulatum	UK: SCOTLAND	East Inverness-shire (VC96)	Insh Marshes NNR, near Kingussie, Cairngorms NP	200	57.1024	-3.97595
306	NMW.Z.2012.041.00146	SN6	-	-	KF894363	-	AGRIOLIMACIDAE	30	Deroceras reticulatum	UK: WALES	Caernarvonshire (VC49)	near Pencraig, NE of Betws-y-Coed, Snowdonia NP	200	53.1068	-3.83584
307	NMW.Z.2012.041.00165	Y23	-	-	KF894378	-	AGRIOLIMACIDAE	30	Deroceras reticulatum	UK: ENGLAND	Mid-west Yorkshire (VC64)	Gate Cote Scar, W of Kettlewell, Wharfedale, Yorkshire Dales NP	225	54.1393	-2.04895
308	NMW.Z.2012.041.00040	DC18	Hap71	-	KF894259	-	AGRIOLIMACIDAE	31	Deroceras invadens	UK: ENGLAND	East Cornwall (VC2)	North Hill Wood, Luxulyan Valley, SE of Luxulyan, NE of St. Austell	80	50.379	-4.72994
309	NMW.Z.2012.041.00054	DF11	-	-	KF894241	-	AGRIOLIMACIDAE	31	Deroceras invadens	UK: ENGLAND	Cambridgeshire (VC29)	Wicken, SE of Soham, S of Ely	5	52.3146	0.303259
310	NMW.Z.2012.041.00063	DF5	-	-	KF894244	-	AGRIOLIMACIDAE	31	Deroceras invadens	UK: ENGLAND	Nottinghamshire (VC56)	Walkeringham NR (Notts. WT), Walkeringham, Trent floodplain W of Gainsborough	15	53.4239	-0.863802
311	NMW.Z.2011.038.00007	DN3	Hap71	-	KF894259	-	AGRIOLIMACIDAE	31	Deroceras invadens	UK: WALES	Denbighshire (VC50)	Pontfadog, Ceiriog Valley, SE of Llangollen	200	52.9311	-3.14995
312	NMW.Z.2011.038.00008	DN6	-	-	KF894245	-	AGRIOLIMACIDAE	31	Deroceras invadens	UK: WALES	Denbighshire (VC50)	Pontfadog, Ceiriog Valley, SE of Llangollen	200	52.9311	-3.14995
313	NMW.Z.2013.072.00006	GB2	-	-	KF894252	-	AGRIOLIMACIDAE	31	Deroceras invadens	UK: SCOTLAND	Lanarkshire (VC77)	Glasgow Botanical Gardens, Kelvinside, Glasgow	50	55.88	-4.29
314	NMW.Z.2011.037.00010	I24	Hap71	-	KF894259	-	AGRIOLIMACIDAE	31	Deroceras invadens	REP. IRELAND	East Cork (H5)	Near Rostellan, E coast of Cork Harbour	35	51.8536	-8.1836
315	NMW.Z.2011.038.00025	K18	Hap71	-	KF894259	-	AGRIOLIMACIDAE	31	Deroceras invadens	UK: ENGLAND	East Kent (VC15)	Folkestone Warren Country Park, E edge of Folkestone	50	51.0947	1.20337
316	NMW.Z.2013.072.00010	M51	-	-	KF894319	-	AGRIOLIMACIDAE	31	Deroceras invadens	UK: NORTHERN IRELAND	Co. Antrim (H39)	Shaw's Bridge, south Belfast	10	54.55	-5.94
317	NMW.Z.2012.041.00104	MRW3	Hap71	-	KF894259	-	AGRIOLIMACIDAE	31	Deroceras invadens	UK: SCOTLAND	Outer Hebrides (VC110)	Asgeirnis, South Uist	10	57.19	-7.4
318	NMW.Z.2012.041.00130	ROY6	-	-	KF894343	-	AGRIOLIMACIDAE	31	Deroceras invadens	GREECE	Crete	Kavros	10	35.35	24.3
319	NMW.Z.2011.038.00057	WF3	-	-	KF894370	-	AGRIOLIMACIDAE	31	Deroceras invadens	UK: ENGLAND	Worcestershire (VC37)	Withybed Wood, Wyre Forest NNR, near Callow Hill, W of Kidderminster	75	52.3896	-2.35702
320	NMW.Z.2012.041.00177	Y41	-	-	KF894385	-	AGRIOLIMACIDAE	31	Deroceras invadens	UK: ENGLAND	North-east Yorkshire (VC62)	Fylingthorpe, Robin Hood's Bay, North York Moors NP	135	54.4255	-0.558821
321	NMW.Z.2012.041.00105	NF1	-	-	KF894327	-	AGRIOLIMACIDAE	32	Deroceras panormitanum	UK: WALES	Glamorganshire (VC41)	Garden at rear of Old Library, The Hayes, Cardiff	15	51.4806	-3.17789
322	NMW.Z.2012.041.00021	12m5	Hap78	-	KF894261	-	AGRIOLIMACIDAE	33-36	Deroceras laeve	UK: WALES	Breconshire (VC42)	Valley of Blaen Taf Fawr stream, route to Pen y Fan from A470, Brecon Beacons NP	550-600	51.8803	-3.4629
323	NMW.Z.2013.072.00001	13L1	Hap77	-	KF894260	-	AGRIOLIMACIDAE	33-36	Deroceras laeve	UK: NORTHERN IRELAND	Co. Armagh (H37)	E shore of Lowry's Lough, E of Armagh	105	54.34	-6.59
324	NMW.Z.2013.072.00002	13L2	-	-	KF894228	-	AGRIOLIMACIDAE	33-36	Deroceras laeve	UK: NORTHERN IRELAND	Co. Armagh (H37)	E shore of Lowry's Lough, E of Armagh	105	54.34	-6.59
325	NMW.Z.2013.072.00003	13L3	-	-	KF894229	-	AGRIOLIMACIDAE	33-36	Deroceras laeve	REP. IRELAND	South-east Galway (H15)	Coole Lough/Coole Park, near Gort, E edge of the Burren area	150	53.09	-8.83
326	NMW.Z.2013.072.00004	13L4	Hap79	-	KF894262	-	AGRIOLIMACIDAE	33-36	Deroceras laeve	REP. IRELAND	South-east Galway (H15)	Coole Lough/Coole Park, near Gort, E edge of the Burren area	150	53.09	-8.83
327	NMW.Z.2011.037.00025	I47	-	-	KF894277	-	AGRIOLIMACIDAE	33-36	Deroceras laeve	REP. IRELAND	South-east Galway (H15)	Coole Lough, near Gort, E edge of the Burren area	150	53.092	-8.84119
328	NMW.Z.2011.038.00032	K6	Hap77	-	KF894260	-	AGRIOLIMACIDAE	33-36	Deroceras laeve	UK: ENGLAND	East Sussex (VC14)	Powdermill Reservoir, Brede High Woods (WT), near Cripp's Corner, High Weald AONB, N of Hastings	25	50.9505	0.558367
329	NMW.Z.2012.041.00092	M33	-	-	KF894311	-	AGRIOLIMACIDAE	33-36	Deroceras laeve	UK: ENGLAND	West Gloucestershire (VC34)	Bristol University Botanical Gardens, Stoke Bishop, Bristol	100	51.4768	-2.62486
330	NMW.Z.2012.041.00095	M36	Hap78	-	KF894261	-	AGRIOLIMACIDAE	33-36	Deroceras laeve	UK: NORTHERN IRELAND	Co. Antrim (H39)	Portmore Lough, E shore of Loch Neagh, W of Glenavy	15	54.56	-6.27
331	NMW.Z.2012.041.00098	M46	Hap79	-	KF894262	-	AGRIOLIMACIDAE	33-36	Deroceras laeve	UK: NORTHERN IRELAND	Co. Antrim (H39)	Portmore Lough, E shore of Loch Neagh, W of Glenavy	15	54.56	-6.27
332	NMW.Z.2011.002.00001	S1	-	-	KF894344	-	AGRIOLIMACIDAE	33-36	Deroceras laeve	UK: SCOTLAND	West Ross & Cromarty (VC105)	Coille na Glas-Leitire, Beinn Eighe NNR, near Kinlochewe	80	57.6295	-5.3531
333	NMW.Z.2011.002.00018	S42	-	-	KF894348	-	AGRIOLIMACIDAE	33-36	Deroceras laeve	UK: SCOTLAND	East Inverness-shire (VC96)	Insh Marshes NNR, near Kingussie, Cairngorms NP	200	57.1024	-3.97595
334	NMW.Z.2012.041.00147	SN7	-	-	KF894364	-	AGRIOLIMACIDAE	33-36	Deroceras laeve	UK: WALES	Caernarvonshire (VC49)	near Pencraig, NE of Betws-y-Coed, Snowdonia NP	200	53.1068	-3.83584
335	NMW.Z.2011.038.00063	WW4	Hap77	-	KF894260	-	AGRIOLIMACIDAE	33-36	Deroceras laeve	UK: ENGLAND	South Devon (VC3)	Wistman’s Wood NNR, N of Two Bridges, Dartmoor NP, E of Tavistock	410	50.5771	-3.96167
336	NMW.Z.2012.041.00172	Y36	-	-	KF894381	-	AGRIOLIMACIDAE	33-36	Deroceras laeve	UK: ENGLAND	Mid-west Yorkshire (VC64)	Fewston Reservoir, Blubberhouses, Vale of York	150	53.9926	-1.74067
337	NMW.Z.2012.041.00052	DF1	-	-	KF894243	-	MILACIDAE	37	Milax gagates	UK: ENGLAND	Cambridgeshire (VC29)	Wicken, SE of Soham, S of Ely	5	52.3146	0.303259
338	NMW.Z.2012.041.00096	M37	-	-	KF894314	-	MILACIDAE	37	Milax gagates	UK: NORTHERN IRELAND	Co. Antrim (H39)	Duncrue St., north Belfast	5	54.62	-5.91
339	NMW.Z.2012.041.00127	ROY3	-	-	KF894340	-	MILACIDAE	37	Milax gagates	REP. IRELAND	Waterford (H6)	Lismore, 30km E of Mallow	c30m	52.1369	-7.93352
340	NMW.Z.2012.041.00129	ROY5	-	-	KF894342	-	MILACIDAE	37	Milax gagates	REP. IRELAND	West Mayo (H27)	Mullet Peninsula	<90	54.2006	-10.0575
341	NMW.Z.2012.041.00044	DC22	-	-	KF894236	-	MILACIDAE	38	Tandonia budapestensis	UK: ENGLAND	South Devon (VC3)	Exhibition Road, East Town, Crediton	45	50.7934	-3.64436
342	NMW.Z.2011.037.00031	I57	-	-	KF894280	-	MILACIDAE	38	Tandonia budapestensis	REP. IRELAND	West Galway (H16)	E end of Rusheen Bay, Knocknacarra, E of Salthill, Galway city	<10	53.2587	-9.10972
343	NMW.Z.2011.037.00045	I79	-	-	KF894286	-	MILACIDAE	38	Tandonia budapestensis	REP. IRELAND	Roscommon (H25)	St. John's Wood, W shore of Loch Ree near Lecarrow, N of Athlone	45	53.5568	-8.00527
344	NMW.Z.2011.038.00027	K20	-	-	KF894296	-	MILACIDAE	38	Tandonia budapestensis	UK: ENGLAND	East Kent (VC15)	Folkestone Warren Country Park, E edge of Folkestone	50	51.0947	1.20337
345	NMW.Z.2012.041.00086	M28	-	-	KF894307	-	MILACIDAE	38	Tandonia budapestensis	UK: WALES	Glamorganshire (VC41)	Clun Avenue, Pontyclun, Rhondda Cynon Taf, W of Cardiff	55	51.5242	-3.38659
346	NMW.Z.2012.041.00108	NF17	-	-	KF894326	-	MILACIDAE	38	Tandonia budapestensis	UK: ENGLAND	South Wiltshire (VC8)	Butts Allotments, E of River Avon, Salisbury	50	51.0809	-1.80295
347	NMW.Z.2011.002.00027	S59	-	-	KF894351	-	MILACIDAE	38	Tandonia budapestensis	UK: SCOTLAND	Mid Perthshire (VC88)	Hill above Easter Moncreiffe, N of Bridge of Earn, S of Perth	50	56.3601	-3.37893
348	NMW.Z.2012.041.00180	Y9	-	-	KF894387	-	MILACIDAE	38	Tandonia budapestensis	UK: ENGLAND	Mid-west Yorkshire (VC64)	Grass Wood NR (WT), Grassington, Wharfedale, Yorkshire Dales NP	250	54.0872	-2.02442
349	NMW.Z.2012.041.00012	12m18	-	-	KF894226	-	MILACIDAE	39	Tandonia cf. cristata	UK: WALES	Glamorganshire (VC41)	Miskin, Rhondda Cynon Taf, W of Cardiff	40	51.5252	-3.38229
350	NMW.Z.2011.037.00042	I71	-	-	KF894285	-	MILACIDAE	39	Tandonia cf. cristata	REP. IRELAND	West Galway (H16)	Spiddal churchyard and surrounding coastal areas, W of Galway city	<10	53.2432	-9.30708
351	NMW.Z.2012.041.00091	M32	-	-	KF894310	-	MILACIDAE	39	Tandonia cf. cristata	UK: WALES	Glamorganshire (VC41)	Both sides of Clun Avenue, Pontyclun, Rhondda Cynon Taf, W of Cardiff	55	51.5242	-3.38659
352	NMW.Z.2012.041.00038	DC16	-	-	KF894233	-	MILACIDAE	40	Tandonia sowerbyi	UK: ENGLAND	South Devon (VC3)	Brunel Woods, near Daccombe, N part of Torquay	130	50.4918	-3.95109
353	NMW.Z.2011.037.00011	I28	-	-	KF894273	-	MILACIDAE	40	Tandonia sowerbyi	REP. IRELAND	North Kerry (H2)	Muckross Peninsula, W of Cloghereen, Killarney NP	30	52.0212	-9.50865
354	NMW.Z.2011.037.00034	I60	-	-	KF894282	-	MILACIDAE	40	Tandonia sowerbyi	REP. IRELAND	South-east Galway (H15)	Coole Lough, near Gort, E edge of the Burren area	150	53.092	-8.84119
355	NMW.Z.2011.038.00026	K19	-	-	KF894294	-	MILACIDAE	40	Tandonia sowerbyi	UK: ENGLAND	East Kent (VC15)	Folkestone Warren Country Park, E edge of Folkestone	50	51.0947	1.20337
356	NMW.Z.2012.041.00075	M14	-	-	KF894300	-	MILACIDAE	40	Tandonia sowerbyi	UK: SCOTLAND	Ayrshire (VC75)	central Ayr	<10	55.4634	-4.63825
357	NMW.Z.2012.041.00090	M31	-	-	KF894309	-	MILACIDAE	40	Tandonia sowerbyi	UK: WALES	Glamorganshire (VC41)	Clun Avenue, Pontyclun, Rhondda Cynon Taf, W of Cardiff	55	51.5242	-3.38659
358	NMW.Z.2012.041.00156	Y12	-	-	KF894374	-	MILACIDAE	40	Tandonia sowerbyi	UK: ENGLAND	North-east Yorkshire (VC62)	behind The Spa complex, South Bay, Scarborough	10	54.2761	-0.398166
359	NMW.Z.2011.037.00001	I1	Hap86	-	KF894265	-	MILACIDAE	41	Tandonia rustica	REP. IRELAND	Mid Cork (H4)	Near Booleypatrick, near Blarney	55	51.9332	-8.58379
360	NMW.Z.2011.037.00013	I3	Hap86	-	KF894265	-	MILACIDAE	41	Tandonia rustica	REP. IRELAND	Mid Cork (H4)	Near Booleypatrick, near Blarney	55	51.9332	-8.58379
361	NMW.Z.2012.041.00009	12m15	-	-	KF894223	-	TESTACELLIDAE	42	Testacella haliotidea	UK: ENGLAND	Berkshire (VC22)	Woodley, central Reading	45	51.4538	-0.934958
362	NMW.Z.2014.001.00004	haliotidea19	-	-	KF894255	-	TESTACELLIDAE	42	Testacella haliotidea	UK: ENGLAND	Surrey (VC17)	Godalming, S of Guildford	100	51.19	-0.62
363	NHMUK.20070674	haliotidea40	-	-	KF894256	-	TESTACELLIDAE	42	Testacella haliotidea	UK: ENGLAND	Oxfordshire (VC23)	Crowmarsh	50	51.48	-1.1
364	NMW.Z.2014.001.00008	M42	-	-	KF894315	-	TESTACELLIDAE	42	Testacella haliotidea	UK: ENGLAND	South Lincolnshire (VC53)	Swinderby	20	53.16	-0.7
365	NMW.Z.2012.041.00085	M26	-	-	KF894306	-	TESTACELLIDAE	43	Testacella maugei	UK: WALES	Glamorganshire (VC41)	W side of Roath Park, Roath, Cardiff	50	51.5112	-3.17868
366	NMW.Z.2014.001.00012	maugei15	Hap88	-	KF894266	-	TESTACELLIDAE	43	Testacella maugei	UK: WALES	Glamorganshire (VC41)	Waterloo Gardens, Penylan, Cardiff	10-15	51.49	-3.15
367	NMW.Z.2014.001.00013	maugei2	-	-	KF894323	-	TESTACELLIDAE	43	Testacella maugei	UK: WALES	Glamorganshire (VC41)	Pontcanna Allotments, Llandaff, Cardiff	10-15	51.5	-3.2
368	NMW.Z.1993.053.00186	maugei36	Hap88	-	KF894266	-	TESTACELLIDAE	43	Testacella maugei	PORTUGAL: MADEIRA	-	Viewpoint NNE of Camara de Lobos	200	32.66	-16.96
369	NMW.Z.2014.001.00014	maugei5	-	-	KF894324	-	TESTACELLIDAE	43	Testacella maugei	UK: WALES	Glamorganshire (VC41)	Cathays Park Memorial Gardens, Cathays, Cardiff	10-15	51.49	-3.18
370	NMW.Z.2014.001.00015	maugei7	Hap88	-	KF894266	-	TESTACELLIDAE	43	Testacella maugei	UK: WALES	Glamorganshire (VC41)	W side of Roath Park, Roath, Cardiff	50	51.5112	-3.17868
371	NMW.Z.2014.001.00016	maugei8	Hap88	-	KF894266	-	TESTACELLIDAE	43	Testacella maugei	UK: WALES	Glamorganshire (VC41)	Allensbank Allotments, Heath, Cardiff	10-15	51.5	-3.18
372	NMW.Z.2014.001.00017	Ret11	-	-	KF894337	-	TESTACELLIDAE	43	Testacella maugei	UK: WALES	Glamorganshire (VC41)	Canton, Cardiff	10	51.4855	-3.22555
373	NMW.Z.2014.001.00018	Ret12	-	-	KF894338	-	TESTACELLIDAE	44	Testacella scutulum	UK: ENGLAND	South-east Yorkshire (VC61)	Beverley, N of Hull	20	53.8512	-0.420515
374	NMW.Z.2014.001.00021	scutulum28	-	-	KF894354	-	TESTACELLIDAE	44	Testacella scutulum	UK: ENGLAND	Middlesex (VC21)	Kensall Green Cemetery, Kensall Green, WC London	50	51.53	-0.23
375	NMW.Z.2012.041.00008	12m14	-	-	KF894222	-	TESTACELLIDAE	45	Testacella cf. scutulum	UK: ENGLAND	South Devon (VC3)	Uplyme, NW of Lyme Regis	50-100	50.73	-2.96
376	NMW.Z.2012.041.00025	AC1	-	-	KF894230	-	TESTACELLIDAE	45	Testacella cf. scutulum	UK: ENGLAND	East Sussex (VC14)	Milton Street, E of Wilmington, NE of Eastbourne	20	50.8179	0.177713
377	NMW.Z.2011.037.00015	I34	-	-	KF894275	-	TESTACELLIDAE	45	Testacella cf. scutulum	REP. IRELAND	Mid Cork (H4)	Near Booleypatrick, near Blarney	55	51.9332	-8.58379
378	NMW.Z.2014.001.00009	M43	-	-	KF894316	-	TESTACELLIDAE	45	Testacella cf. scutulum	UK: ENGLAND	South Devon (VC3)	Polsloe Bridge allotments, Polsloe, Exeter	70	50.73	-3.5
379	NMW.Z.2013.072.00012	M53	-	-	KF894320	-	TESTACELLIDAE	45	Testacella cf. scutulum	UK: ENGLAND	South Devon (VC3)	Northernhay Gardens, central Exeter	50	50.73	-3.53
380	NMW.Z.2012.041.00066	DF8	Hap90	-	KF894268	-	BOETTGERILLIDAE	46	Boettgerilla pallens	UK: ENGLAND	South-west Yorkshire (VC63)	near Anston Stones Wood, South Anston, E of Worksop	90	53.3503	-1.21729
381	NMW.Z.2012.041.00089	M30	Hap90	-	KF894268	-	BOETTGERILLIDAE	46	Boettgerilla pallens	UK: WALES	Glamorganshire (VC41)	Both sides of Clun Avenue, Pontyclun, Rhondda Cynon Taf, W of Cardiff	55	51.5242	-3.38659
382	NMW.Z.2011.002.00029	S61	-	-	KF894352	-	BOETTGERILLIDAE	46	Boettgerilla pallens	UK: SCOTLAND	Mid Perthshire (VC88)	hill above Easter Moncreiffe, N of Bridge of Earn, S of Perth	50	56.3601	-3.37893
383	NMW.Z.2012.041.00006	12m10	Hap89	-	KF894267	-	TRIGONOCHLAMYDIDAE	47	Selenochlamys ysbryda	UK: WALES	Breconshire (VC42)	Talgarth, NE of Brecon	120	51.9971	-3.23364
384	NMW.Z.2014.001.00020	Ret9	Hap89	-	KF894267	-	TRIGONOCHLAMYDIDAE	47	Selenochlamys ysbryda	UK: ENGLAND	North Somerset (VC6)	Knowle, Bristol BS4 1NN	60	51.4239	-2.59538
385	NMW.Z.2014.001.00022	ysbryda30	Hap89	-	KF894267	-	TRIGONOCHLAMYDIDAE	47	Selenochlamys ysbryda	UK: WALES	Glamorganshire (VC41)	Canton, Cardiff	10-15	51.48	-3.21
386	NMW.Z.2014.001.00023	ysbryda31	Hap89	-	KF894267	-	TRIGONOCHLAMYDIDAE	47	Selenochlamys ysbryda	UK: WALES	Glamorganshire (VC41)	Pontcanna, Cardiff	10-15	51.49	-3.2
387	NMW.Z.2014.001.00024	ysbryda32	Hap89	-	KF894267	-	TRIGONOCHLAMYDIDAE	47	Selenochlamys ysbryda	UK: WALES	Monmouthshire (VC35)	Liswerry, E Newport	10-15	51.58	-2.94
388	NMW.Z.2008.005.00002	ysbryda33	-	-	KF894388	-	TRIGONOCHLAMYDIDAE	47	Selenochlamys ysbryda	UK: WALES	Glamorganshire (VC41)	Canton, Cardiff	10-15	51.48	-3.21
